# Supplementary material for: Unique diagnostic signatures of concussion in the saliva of male athletes: the Study of Concussion in Rugby Union through MicroRNAs (SCRUM)
Source: HighWire-hosted journal article supplement (doi:10.1136/bjsports-2020-103274), 2021-03-23
Supplement: bjsports-2020-103274supp001_data_supplement.pdf [file bjsports-2020-103274supp001_data_supplement.pdf]

## Supplementary Materials

### Procedures

Two ml of saliva was passively collected from all subjects at clubs competing in the top two tiers of male Rugby Football Union in England across the 2017-18 (Premiership and Championship clubs) and 2018-19 (Premiership clubs only) seasons. Samples collected pre-season were used as baseline. During the season, samples were collected when club medical staff assessed players for concussion following head injury events with the potential to result in concussion using the standardised World Rugby Head Injury Assessment (HIA) protocol. [1] The key features of the protocol, that is in widespread use in elite professional rugby, are mandatory standardised assessments, aligned with the Sports Concussion Assessment Tool (SCAT5) at three time points informing a team physician's clinical diagnosis. A definitive diagnosis of concussion is made if a player demonstrates observable signs of concussion at the time of the head injury event, requiring immediate and permanent removal from play (e.g. loss of consciousness, tonic posturing or ataxia) or a clinical diagnosis of concussion is made supported by the standardised (SCAT5) assessment performed post game and/or 36-48 hrs later. The interpretation of the SCAT5 assessment is with reference to individual baseline values and any negative deviation from baseline performance is recommended as strongly suggestive of a diagnosis of concussion, though the clinical judgment of the team physician takes precedence over the performance in the SCAT5 assessment. If the defined observable signs of concussion are not clearly seen following a witnessed head injury event however, and the diagnosis of concussion is uncertain, a player may be temporarily substituted to allow for a standardised in match but off field assessment to be conducted by the team physician. If concussion is then excluded by the team physician, there is an ability for the player to return to

play. World rugby rules required this assessment to be completed within 10 minutes, but a special dispensation was given for an extension of 3 minutes to permit study procedures to be carried out as part of the protocol for the current study in season 1.

Annual mandatory training programmes must be undertaken by all medical staff involved in the delivery of the HIA protocol. Formal audit, governance and disciplinary processes are in place to monitor compliance. All assessments are entered by team medical staff in real-time on an app (CSx) (<https://csx.co.nz/our-story/>) and are available for subsequent audit and review.

The HIA protocol incorporates a very clearly defined and replicable definition of what constitutes a sport-related concussion and provided the diagnostic reference for our analysis. For the purpose of this study, we defined the in-match assessment as time point T1, the post-match assessment as time point T2 and the 36-48 hour assessment as time point T3.

Participants who were evaluated using the HIA protocol formed the HIA+ group if concussion was confirmed at any of the three time points, and the HIA- group if concussion was initially considered but subsequently ruled out.

Whenever a participant was assessed post-match (T2) for possible concussion, team medical staff were asked to identify another participant who had played a similar number of minutes in the same match but who had not had been assessed for concussion and, if possible, a third participant who had had to be withdrawn from that match due to a musculoskeletal injury. Samples were requested from all categories of player at near enough the same time after the final whistle and were completed before players finished getting showered and changed.

These provided samples at time points T2 and T3, to form the uninjured and the musculoskeletal Injury (MSK) control groups respectively.

The HIA-T2 assessment was usually carried out between 30-90 minutes after the match finished for the player. Therefore, the range of HIA-T2 assessments was from 30 minutes

through to 190 minutes (90 minutes+80 minutes playing time+20 minutes interval) post injury if a player was removed in the first or completed last minute of the game respectively.

It is also important to note that not all players had an assessment at time point T1, as not all significant head injury events are identified in game and symptoms for some players only develop post-game. Moreover, it would have not been possible to obtain samples from the uninjured group during the match, therefore, it was predetermined in the study design that T2 would be the primary time point of interest for comparisons, as this would provide the most consistent timeframe to collect saliva samples across all groups.

Although team physicians were responsible for the clinical management of each player in real-time, in order to ensure a consistent diagnostic standard for the study, the full HIA protocol documentation for each player assessed for concussion and (where available) the video footage of the inciting head injury event were subsequently reviewed independently against the HIA protocol by two experienced sports medicine doctors and England Senior National Team doctors (SPTK and RT). They were blinded to any laboratory results and adjudicated each incident as HIA+ or HIA- or recommended its exclusion due to insufficient or conflicting evidence. For completeness, the analysis of the uncensored data is presented in this section.

### **Saliva collection**

Medical staff at the respective clubs were trained in the collection procedure. Saliva was collected in Oragene®-RNA RE-100 saliva self-collection kits (DNA Genotek) containing an RNA stabilizing solution preserving the samples for up to 8 weeks. Saliva was collected from each participant at enrolment and at the time points described above. Samples were transported to the lab in Birmingham, where they were processed in line with the manufacturer's protocol for storage. During the second season, DNA Genotek discontinued the RE-100 kits and replaced them with an equivalent product (CP-190). This was utilised from January 2018 onwards.

## NGS procedure

### Library preparation and Next Generation Sequencing

Library preparation was carried out using the QIAseq miRNA Library Kit (QIAGEN). A total of 5ul total RNA was converted into microRNA NGS libraries. Adapters containing UMIs were ligated to the RNA. Then RNA was converted to cDNA. The cDNA was amplified using PCR (22 cycles) and during the PCR, indices were added. After PCR the samples were purified. Library preparation QC was performed using either the Bioanalyzer 2100 (Agilent) or TapeStation4200 (Agilent). Based on quality of the inserts and the concentration measurements the libraries were pooled in equimolar ratios. The library pool(s) were quantified using the qPCR ExiSEQ LNA™ Quant kit (Exiqon). The library pools were then sequenced on a NextSeq500 sequencing instrument according to the manufacturers instructions (NEBNext Multiplex Small RNA Library Prep Set for Illumina) to make approximately 163-175 base-pair sized libraries. Raw data as demultiplexed and FASTQ files for each sample were generated using the bcl2fastq software (Illumina inc.). FASTQ data were checked using the FastQC tool (<http://.bioinformatics.babraham.ac.uk/projects/fastqc/>).

### Mapping

A reference profile of sequencing data for each sample was obtained using the whole human genome sequence GRCh37, downloaded from the Genome Reference Consortium and mirbase\_20 as an annotation reference. Reads were aligned to the miRbase using Bowtie2.[2] The mapping criteria for aligning reads to spike-ins, abundant sequence and miRBase were the reads to have perfect match to the reference sequences. For mapping to the genome, the restricting was one mismatch which was allowed in the first 32 bases of the read. No in-dels were allowed in mapping. Unaligned reads were mapped against the host reference genome and used as input for mirPara [3] and miRbase to predict putative miRNAs. [4,5]

### Statistical analysis

P-values for significantly differentially expressed sncRNAs are estimated by an exact test on the negative binomial distribution. Aligned reads were counted and differential expression analysis, p-values for significantly differentially expressed microRNAs and false discovery rate according to Benjamini-Hochberg were performed with EdgeR.[6] For normalisation, the trimmed mean of M-values (TMM) method based on log-fold and absolute gene-wise changes in expression levels between samples was used.

### qPCR season1

14 µl RNA was reverse transcribed in 70 µl reactions using the miRCURY LNA RT Kit (QIAGEN). cDNA was diluted 50 x and assayed in 10 µl PCR reactions according to the protocol for miRCURY LNA miRNA PCR; each miRNA was assayed once by qPCR on the miRNA Ready-to-Use PCR, custom panel using miRCURY LNA SYBR Green master mix. qPCR Probes are the complementary sequences of the sncRNAs of interest (eTable 2 below).

Negative controls excluding template from the reverse transcription reaction was performed and profiled like the samples. The amplification was performed in a LightCyclerp 480 Real-Time PCR System (Roche) in 384 well plates. The amplification curves were analysed using the Roche LC software, both for determination of Cq (by the 2nd derivative method) and for melt curve analysis. The amplification efficiency was calculated using algorithms similar to the LinReg software. All assays were inspected for distinct melting curves (Tm) and the Tm was checked to be within known specifications for the assay. Furthermore, assays must be detected with 0 Cq less than the negative control, and with Cq<37 to be included in the data analysis. Data that did not pass these criteria were omitted from any further analysis. Cq was calculated as the 2nd derivative. Normalization was performed based on the average of hsa-

miR-29c-3p and hsa-let-7b-5p (custom normalizer assays), the two most stable miRs identified across all samples by Normofinder software.[7]

The formula used to calculate the normalized Cq values is the difference between the custom normalizer assays mean Cq and the assay Cq (miRNA of interest). After normalization 20 has been added to the normalized dCq values to shift the numbers in a positive range to allow using the qPCR analysis pipelines according to Qiagen procedures. While processing the data in the qPCR pipeline a minus is inserted before the normalized dCq value. A higher value indicates that the miRNA is more abundant in that sample.

#### qPCR season 2

RNA from saliva samples was extracted and analysed with exactly the same protocol used for SCRUM1 and qPCR was performed using the Applied Biosystems Quantstudio 5 (ThermoFisher Scientific) for amplification and melt curve analysis.

## **ADDITIONAL ANALYSIS RESULTS**

### **NGS and qPCR data analysis**

The validation was performed in 2 different qPCR steps. Initially, all fragments showing a different expression between HIA+ T2 and MSK+uninjured T2 groups in NGS analysis (eTable1), were selected for the first qPCR validation step. This list, comprising 38 known microRNAs, 233 put-miRs and 168 other small RNAs, was analysed in 193 samples. Following this initial analysis, based on the strength of discrimination of concussed subjects, we selected 32 known microRNAs (panel A); 28 other small RNAs (panel B) and 34 put-miRs (panel C) for further analysis in 376 independent samples. The Cq values obtained from the 2 qPCR validation sets were finally merged and collected in a total of 569 samples. Of the 94 sncRNAs,

31 had >30% missing values and were removed. The remaining 63 sncRNAs (comprising of 23 microRNAs, 11 putative microRNAs and 29 other small non-coding RNAs) are listed in eTable2 and were used for statistical comparisons between the different groups and time points (eTable 3,4,5,6).

The power analyses indicating how many samples are needed per group in a follow-up study to validate the results from the present analysis was calculated at a 0.95 level of confidence and for target p-value 0.05.

**eTable 1: List of microRNAs (Panel A), other small non-coding (Panel B) and putative\* microRNAs selected from NGS analysis.**

\*putative microRNAs are not previously described sequences and bioinformatically predicted as new microRNAs

Panel A

| microRNAs        | logFC       | logCPM      | p-Value     | FDR         |
|------------------|-------------|-------------|-------------|-------------|
| hsa-miR-199a-5p  | -3.79380184 | 5.744164606 | 8.15823E-06 | 0.004797041 |
| hsa-miR-133a-3p  | -4.95698696 | 10.40020121 | 7.04586E-05 | 0.020714819 |
| hsa-miR-206      | -4.6959152  | 9.788488822 | 0.000180043 | 0.03528849  |
| hsa-miR-1273h-3p | 2.629420889 | 3.481729832 | 0.001297451 | 0.190725263 |
| hsa-miR-133b     | -4.20181151 | 6.465178373 | 0.002184888 | 0.256942851 |
| hsa-miR-561-5p   | 1.579551555 | 4.525850808 | 0.003970504 | 0.348018465 |
| hsa-miR-126-3p   | -1.41838668 | 8.449681001 | 0.004143077 | 0.348018465 |
| hsa-miR-16-1-3p  | 1.43849327  | 4.458454478 | 0.005764959 | 0.352449414 |
| hsa-miR-449b-3p  | 3.467958972 | 3.218975    | 0.005920497 | 0.352449414 |
| hsa-miR-449c-5p  | 2.749952622 | 5.534179256 | 0.006033974 | 0.352449414 |
| hsa-miR-6748-3p  | 4.143101791 | 3.188086662 | 0.007073212 | 0.352449414 |
| hsa-miR-133a-5p  | -3.92797466 | 4.752927061 | 0.008472679 | 0.352449414 |
| hsa-miR-34b-3p   | 2.1437498   | 4.339967792 | 0.008637715 | 0.352449414 |
| hsa-miR-6824-3p  | 2.731145621 | 3.076936275 | 0.008970282 | 0.352449414 |
| hsa-miR-5195-5p  | 5.376105018 | 4.09767258  | 0.009313959 | 0.352449414 |
| hsa-miR-5096     | 2.906908779 | 4.723794715 | 0.00959046  | 0.352449414 |
| hsa-miR-4488     | 3.491520052 | 3.097320079 | 0.012515423 | 0.409279535 |
| hsa-miR-92a-3p   | -0.60902412 | 10.49283489 | 0.012885103 | 0.409279535 |
| hsa-miR-1        | -2.36876254 | 10.80951287 | 0.013692259 | 0.409279535 |
| hsa-miR-885-5p   | 1.507019382 | 4.182851751 | 0.013921073 | 0.409279535 |
| hsa-miR-548h-5p  | 2.055544755 | 3.480848725 | 0.015148132 | 0.42414769  |
| hsa-miR-1246     | 0.980484408 | 14.78271469 | 0.017085283 | 0.445746733 |
| hsa-miR-4492     | -3.18487947 | 3.53612341  | 0.017435672 | 0.445746733 |
| hsa-miR-484      | 1.274418725 | 6.148369199 | 0.019071294 | 0.449461809 |
| hsa-miR-449a     | 2.203777576 | 6.338766334 | 0.019109771 | 0.449461809 |
| hsa-miR-3122     | 3.142476669 | 3.078975177 | 0.02000366  | 0.452390465 |

|                   |             |             |             |             |
|-------------------|-------------|-------------|-------------|-------------|
| hsa-miR-1180-3p   | 1.165471248 | 3.889331639 | 0.021316281 | 0.457201951 |
| hsa-miR-619-5p    | 2.792045377 | 3.207604869 | 0.021771521 | 0.457201951 |
| hsa-miR-2277-5p   | 1.067026052 | 4.057818901 | 0.023836409 | 0.474930011 |
| hsa-miR-5699-3p   | 1.876788488 | 2.955683933 | 0.024231123 | 0.474930011 |
| hsa-miR-125b-2-3p | -0.96587973 | 4.933520984 | 0.025679562 | 0.487083301 |
| hsa-miR-4449      | 2.06863176  | 3.047374886 | 0.027679506 | 0.503997815 |
| hsa-miR-671-3p    | 1.125735449 | 3.934232773 | 0.02867908  | 0.503997815 |
| hsa-miR-33a-3p    | 0.959071217 | 4.091785492 | 0.029142731 | 0.503997815 |
| hsa-miR-193b-5p   | -1.14025756 | 4.138245693 | 0.031271072 | 0.522692794 |
| hsa-miR-34c-3p    | 1.690242737 | 4.489423918 | 0.0320016   | 0.522692794 |
| hsa-miR-339-5p    | 1.057419584 | 7.902671962 | 0.034354837 | 0.545963351 |
| hsa-miR-6813-3p   | 2.813650185 | 2.933287004 | 0.035310016 | 0.546376034 |
| hsa-miR-671-5p    | 0.838663749 | 5.600518309 | 0.047339286 | 0.598988904 |
| hsa-miR-1537-5p   | 1.129462606 | 4.117629615 | 0.048138455 | 0.598988904 |
| hsa-miR-193a-3p   | -1.5845588  | 3.995294293 | 0.048897053 | 0.598988904 |
| hsa-miR-130a-3p   | -0.88824466 | 6.580760266 | 0.051263632 | 0.604409433 |
| hsa-miR-126-5p    | -1.22112275 | 8.006357503 | 0.051621005 | 0.604409433 |



## Panel B

| small non-coding RNAs | logFC       | logCPM      | p-Value     | FDR         |
|-----------------------|-------------|-------------|-------------|-------------|
| tRNA138-ArgACG        | -2.27538237 | 7.674009775 | 0.000243882 | 0.204980883 |
| RNU6-11               | -1.67718785 | 4.732492163 | 0.000245185 | 0.204980883 |
| tRNA11-ArgACG         | -2.21044709 | 7.59261144  | 0.000408122 | 0.204980883 |
| RNU6-36               | -1.84798113 | 4.63862015  | 0.000436362 | 0.204980883 |
| tRNA175-SerGCT        | -1.84762954 | 8.390549302 | 0.001054009 | 0.290869197 |
| U3.39                 | 4.655316415 | 4.424357984 | 0.001147835 | 0.290869197 |
| RNU4-6P               | -1.71160894 | 4.864935322 | 0.001317818 | 0.290869197 |
| U6.375                | -1.86391998 | 4.231358228 | 0.001366655 | 0.290869197 |
| snoU13.63             | 4.286830869 | 4.29762358  | 0.001552935 | 0.290869197 |
| tRNA8-ThrAGT          | -1.65324248 | 9.428427256 | 0.001556007 | 0.290869197 |
| RNU6-1                | -1.37118776 | 4.843026936 | 0.001713194 | 0.290869197 |
| RNU6-31               | -1.53604238 | 4.741724921 | 0.002351551 | 0.290869197 |
| tRNA4-ArgTCG          | -1.70070174 | 10.2139807  | 0.002452994 | 0.290869197 |
| tRNA130-ValCAC        | -2.21562973 | 4.853113645 | 0.002797565 | 0.290869197 |
| U3.3                  | -1.72401526 | 5.267608648 | 0.002991025 | 0.290869197 |
| U4.57                 | -1.55456476 | 4.807782758 | 0.003084965 | 0.290869197 |
| tRNA84-GluTTC         | -1.39818637 | 10.32369425 | 0.003223874 | 0.290869197 |
| U6.428                | -1.83108856 | 4.169870903 | 0.003289229 | 0.290869197 |
| U3.4                  | -1.80036039 | 5.421618508 | 0.00346512  | 0.290869197 |
| tRNA95-AsnGTT         | -2.24304788 | 4.752212371 | 0.003469246 | 0.290869197 |
| uc003oif.3            | -2.59243747 | 4.028384043 | 0.003838286 | 0.290869197 |
| U3.2                  | -1.73251154 | 5.414684824 | 0.003880282 | 0.290869197 |
| U3.42                 | 2.126244843 | 4.003126274 | 0.003910676 | 0.290869197 |
| uc002tgp.l            | 2.810368883 | 4.510093789 | 0.004221387 | 0.290869197 |
| tRNA105-PseudoTTC     | -1.59015632 | 7.983774255 | 0.004475105 | 0.290869197 |
| tRNA4-GluCTC          | -1.60952388 | 8.107675756 | 0.00453217  | 0.290869197 |
| RNU6-14               | -1.86375965 | 4.058373711 | 0.004721183 | 0.290869197 |
| tRNA4-ThrAGT          | -1.34446936 | 8.68050744  | 0.004730298 | 0.290869197 |
| U6.97                 | -2.76317407 | 3.745083257 | 0.004815026 | 0.290869197 |
| tRNA120-AlaAGC        | -1.31815493 | 9.587766586 | 0.004875694 | 0.290869197 |
| snoU13.348            | 2.256666202 | 4.075754187 | 0.005036202 | 0.290869197 |
| U1.105                | -2.32216301 | 4.207692971 | 0.005058512 | 0.290869197 |
| tRNA27-MetCAT         | -2.34782418 | 6.706470837 | 0.0051084   | 0.290869197 |
| U1.10                 | -2.59329176 | 4.816351388 | 0.005540106 | 0.306172302 |
| tRNA134-GluTTC        | -1.3431528  | 10.39664851 | 0.006091168 | 0.32697053  |
| RNU6-6                | -1.54430018 | 4.19348578  | 0.00626447  | 0.32697053  |
| Y_RNA.75              | 1.904869354 | 5.50161645  | 0.006713926 | 0.340251318 |
| tRNA8-Undet           | 1.964251986 | 4.197405842 | 0.006905386 | 0.340251318 |
| SNORA25               | -2.35025006 | 3.740784336 | 0.007062161 | 0.340251318 |
| RNU6-39               | -1.60601357 | 4.333253034 | 0.007621329 | 0.3538182   |
| tRNA119-AlaCGC        | -1.25397272 | 9.514833568 | 0.007808074 | 0.3538182   |
| tRNA85-PseudoTTC      | 1.126764653 | 5.8624175   | 0.008322426 | 0.3538182   |
| U6.254                | -1.80163898 | 3.954386151 | 0.008365638 | 0.3538182   |
| tRNA3-ArgCCT          | -1.40848109 | 10.46544955 | 0.008483646 | 0.3538182   |
| SNORD114-2            | -3.1187271  | 3.929437693 | 0.008576479 | 0.3538182   |
| tRNA162-MetCAT        | -2.31337858 | 6.829504657 | 0.008700411 | 0.3538182   |
| Y_RNA.661             | -2.13613309 | 3.924521406 | 0.008896949 | 0.3538182   |

|                   |             |             |             |             |
|-------------------|-------------|-------------|-------------|-------------|
| tRNA8-AlaTGC      | -1.03417608 | 10.23229845 | 0.009262877 | 0.3538182   |
| tRNA56-ThrTGT     | -1.43137722 | 10.38511882 | 0.009580922 | 0.3538182   |
| tRNA26-AsnGTT     | -1.2260783  | 8.800207822 | 0.009587969 | 0.3538182   |
| tRNA73-ArgCCG     | -0.87676773 | 7.646480047 | 0.009603368 | 0.3538182   |
| tRNA156-ArgACG    | -1.38659506 | 6.417990561 | 0.009974671 | 0.36043089  |
| tRNA28-IleAAT     | -0.96475102 | 8.290575814 | 0.010463073 | 0.370945534 |
| RNU6-33           | -1.41177741 | 4.713635974 | 0.010694162 | 0.372117242 |
| tRNA3-ProTGG      | 2.564031745 | 13.63247318 | 0.01106572  | 0.37247176  |
| tRNA19-ArgTCG     | -1.57386692 | 9.439040466 | 0.011100808 | 0.37247176  |
| tRNA164-MetCAT    | -2.24158666 | 6.824859219 | 0.011731788 | 0.372701442 |
| tRNA13-AlaCGC     | -1.05980195 | 9.619304583 | 0.011862589 | 0.372701442 |
| U6atac.4          | -2.29659983 | 4.169967341 | 0.012205483 | 0.372701442 |
| tRNA9-AlaAGC      | -1.76859219 | 4.913678407 | 0.012206837 | 0.372701442 |
| tRNA132-PseudoCAC | -2.28282945 | 4.122549605 | 0.012249051 | 0.372701442 |
| RNU6-7            | -1.54429239 | 4.25135459  | 0.012297759 | 0.372701442 |
| tRNA20-MetCAT     | -1.09889413 | 8.557399735 | 0.012787128 | 0.376829052 |
| U3.24             | -1.49142526 | 5.576968961 | 0.01283505  | 0.376829052 |
| U6atac.29         | -2.38352866 | 3.785989635 | 0.013059629 | 0.377523747 |
| tRNA2-LeuTAA      | -1.66936742 | 3.974107686 | 0.013474016 | 0.383601155 |
| tRNA1-AsnGTT      | -0.93147558 | 7.962088764 | 0.014090452 | 0.39410967  |
| tRNA40-ThrAGT     | -1.20252417 | 8.00746198  | 0.014483817 | 0.39410967  |
| Y_RNA.684         | 2.380168702 | 3.849210771 | 0.014510103 | 0.39410967  |
| snoU13.86         | 3.047260829 | 3.887450563 | 0.014700195 | 0.39410967  |
| uc021qtn.1        | -2.42558461 | 4.054546636 | 0.015164662 | 0.39410967  |
| RNU6-9            | -1.27226823 | 4.707463894 | 0.01590456  | 0.39410967  |
| tRNA13-AlaTGC     | -1.07694323 | 9.510390292 | 0.016125256 | 0.39410967  |
| tRNA36-ArgACG     | -1.42222279 | 6.510745574 | 0.016234233 | 0.39410967  |
| Y_RNA.719         | -1.87621292 | 4.049552581 | 0.016340695 | 0.39410967  |
| RNU6-10           | -1.35736219 | 4.333057065 | 0.016389921 | 0.39410967  |
| SCARNA4           | 0.900162218 | 5.772147414 | 0.016691546 | 0.39410967  |
| tRNA10-AlaCGC     | -1.08617369 | 9.364295675 | 0.016698714 | 0.39410967  |
| tRNA12-SerAGA     | -2.17129695 | 3.960150632 | 0.016746309 | 0.39410967  |
| uc011ley.2        | -1.1603733  | 7.787151849 | 0.01677955  | 0.39410967  |
| U1.116            | -2.53057666 | 4.143384152 | 0.017351703 | 0.3975759   |
| tRNA7-SerGCT      | -1.22744148 | 8.048077286 | 0.017683906 | 0.3975759   |
| U6.266            | -1.68215765 | 4.162672228 | 0.018006863 | 0.3975759   |
| tRNA136-AsnGTT    | -1.18546894 | 6.252578135 | 0.018057145 | 0.3975759   |
| uc031qaf.1        | 3.07982529  | 4.21672176  | 0.018100789 | 0.3975759   |
| RNU4-9P           | 1.971224737 | 3.892961999 | 0.018196662 | 0.3975759   |
| RNU6-48           | -1.41494718 | 4.179417866 | 0.018610429 | 0.40194249  |
| U4.64             | -1.46842052 | 4.573943777 | 0.019052174 | 0.405290215 |
| SNORA70.5         | -2.3066839  | 3.705457206 | 0.019552672 | 0.405290215 |
| tRNA83-AsnGTT     | -0.95893311 | 7.650753844 | 0.019695599 | 0.405290215 |
| tRNA21-ArgCCT     | -1.3243702  | 9.463647642 | 0.019740822 | 0.405290215 |
| RNU6-26           | -1.26772628 | 4.674223977 | 0.019843906 | 0.405290215 |
| tRNA4-AsnGTT      | -0.95216219 | 7.630343605 | 0.020477143 | 0.409060595 |
| U1.28             | -1.66671858 | 4.666167958 | 0.020920233 | 0.409060595 |
| U6.168            | -1.75957771 | 3.988195609 | 0.021394709 | 0.409060595 |
| RNU6-41           | -1.2429829  | 4.599263654 | 0.021413125 | 0.409060595 |

|                   |             |             |             |             |
|-------------------|-------------|-------------|-------------|-------------|
| tRNA15-ThrCGT     | -0.94643604 | 8.011751983 | 0.021715336 | 0.409060595 |
| tRNA88-PseudoCCT  | 1.406009411 | 4.775992477 | 0.021727046 | 0.409060595 |
| SNORD116-19       | -2.08108498 | 3.769046556 | 0.022072958 | 0.409060595 |
| uc031qtw.1        | -1.59586877 | 3.698957807 | 0.022111714 | 0.409060595 |
| U6.422            | -2.18510267 | 3.771206474 | 0.022136152 | 0.409060595 |
| U2.3              | -1.09052752 | 5.567176812 | 0.022205525 | 0.409060595 |
| U3.20             | -1.55295135 | 5.225744713 | 0.022487766 | 0.410237987 |
| tRNA165-IleAAT    | -0.81674152 | 8.525161575 | 0.023067622 | 0.416176914 |
| snoU13.160        | -1.88380693 | 3.690235583 | 0.023604159 | 0.416176914 |
| tRNA36-ThrAGT     | -1.09203025 | 7.99788872  | 0.023653935 | 0.416176914 |
| tRNA6-TrpCCA      | -1.06582891 | 10.59444161 | 0.023699271 | 0.416176914 |
| SNORA57           | -1.08263716 | 5.14915277  | 0.024108905 | 0.416665441 |
| tRNA10-PseudoTGA  | -1.42087364 | 5.662435588 | 0.024173287 | 0.416665441 |
| uc001myu.3        | -2.42408101 | 4.681561536 | 0.02449142  | 0.416665441 |
| Y_RNA.428         | -1.2545658  | 6.369684888 | 0.024614084 | 0.416665441 |
| SCARNA1           | -1.61719768 | 3.852134167 | 0.025631096 | 0.427567583 |
| tRNA95-AlaAGC     | -1.73027899 | 5.825175769 | 0.02592783  | 0.427567583 |
| RNU6-27           | -1.6140049  | 3.926299889 | 0.025940769 | 0.427567583 |
| SNORA79.1         | -1.15165538 | 4.196182085 | 0.026538748 | 0.433620064 |
| tRNA9-IleAAT      | -0.73350055 | 8.536774944 | 0.027547951 | 0.446033785 |
| tRNA9-TyrGTA      | -1.6487492  | 3.959996969 | 0.027773259 | 0.446033785 |
| tRNA23-ArgCCG     | -1.31033598 | 11.27930104 | 0.029044541 | 0.450180862 |
| snoU13.318        | -1.91587082 | 3.698261411 | 0.029045067 | 0.450180862 |
| snoU13.328        | 2.684496203 | 4.280709032 | 0.029064976 | 0.450180862 |
| RNU4-4P           | -1.2311376  | 4.615863264 | 0.029137817 | 0.450180862 |
| Y_RNA.633         | -1.30999509 | 4.118055921 | 0.029229412 | 0.450180862 |
| RNU5F-4P          | -1.48557387 | 4.239223966 | 0.03016703  | 0.460844298 |
| tRNA7-AsnGTT      | -0.88097126 | 7.861805832 | 0.031177808 | 0.472444358 |
| tRNA2-ArgCCT      | -1.14460252 | 9.768619156 | 0.031689267 | 0.476353057 |
| tRNA18-ArgCCT     | -1.24884324 | 9.421599432 | 0.032541851 | 0.484021239 |
| SNORD116-25       | 1.724675764 | 6.034751745 | 0.032861609 | 0.484021239 |
| uc021ybm.1        | -0.9249247  | 7.924193472 | 0.033450576 | 0.484021239 |
| tRNA8-SerGCT      | -0.98753133 | 8.589816708 | 0.033481121 | 0.484021239 |
| tRNA11-IleAAT     | -0.72451906 | 8.545784821 | 0.033487366 | 0.484021239 |
| Y_RNA.597         | 1.732733959 | 3.760735382 | 0.034265836 | 0.491492414 |
| snoU13.120        | 2.312826375 | 3.740373282 | 0.034550843 | 0.491826017 |
| uc031qpu.1        | 2.324532842 | 3.768342356 | 0.035349099 | 0.49676233  |
| RNU6-32           | -1.18812391 | 4.327815738 | 0.035426372 | 0.49676233  |
| tRNA100-PseudoGAA | -1.02843913 | 9.329302032 | 0.036035102 | 0.501555229 |
| SNORD116-21       | 2.33201432  | 3.747426753 | 0.039146195 | 0.532853476 |
| tRNA5-IleTAT      | -1.08777911 | 7.207879458 | 0.039415342 | 0.532853476 |
| Y_RNA.522         | -1.81515534 | 4.101934504 | 0.039799275 | 0.532853476 |
| tRNA12-ArgCCT     | -1.27295081 | 9.216801318 | 0.039946538 | 0.532853476 |
| U6atac.20         | -1.94596283 | 4.036085302 | 0.040551585 | 0.532853476 |
| RNU6-4            | -1.52406279 | 4.105411071 | 0.040667896 | 0.532853476 |
| SNORD3B-2         | -0.79576357 | 8.540015612 | 0.040838684 | 0.532853476 |
| tRNA11-AsnGTT     | -1.30462038 | 4.970141103 | 0.040850618 | 0.532853476 |
| tRNA31-AsnGTT     | -0.87710624 | 7.603607761 | 0.041107699 | 0.532853476 |
| Y_RNA.727         | -1.25639747 | 4.115195415 | 0.041225337 | 0.532853476 |

|                |             |             |             |             |
|----------------|-------------|-------------|-------------|-------------|
| RNU6-73        | -1.46456929 | 4.007858615 | 0.042069664 | 0.532853476 |
| SNORA65        | -0.88817274 | 4.89950806  | 0.042220138 | 0.532853476 |
| tRNA7-LeuAAG   | -0.71492427 | 8.880350642 | 0.042319347 | 0.532853476 |
| tRNA144-AspGTC | -0.82964134 | 11.54055138 | 0.042320413 | 0.532853476 |
| U6atac.25      | -1.77774451 | 3.762252674 | 0.042537531 | 0.532853476 |
| tRNA1-ArgCCG   | -0.76847131 | 7.276226466 | 0.043525106 | 0.535998445 |
| SNORA7.4       | -1.13362614 | 3.738511771 | 0.043665668 | 0.535998445 |
| tRNA125-ThrCGT | -1.08045128 | 5.458664529 | 0.043842913 | 0.535998445 |
| RNU6-45        | -1.22266691 | 4.217769003 | 0.043929622 | 0.535998445 |
| tRNA131-GlnCTG | -1.07262477 | 7.700551934 | 0.04461864  | 0.538855811 |
| U6.1249        | 1.668615649 | 3.756761746 | 0.044737364 | 0.538855811 |
| Y_RNA.245      | 2.25187274  | 3.754483152 | 0.045943642 | 0.545496798 |
| U6.601         | -1.35324491 | 3.970443965 | 0.046003943 | 0.545496798 |
| RNU5E-4P       | -1.0837447  | 5.498269856 | 0.046159655 | 0.545496798 |
| tRNA66-AlaTGC  | -0.81125784 | 9.226831102 | 0.046988475 | 0.545729532 |
| tRNA32-MetCAT  | -0.82679514 | 8.99856138  | 0.047086999 | 0.545729532 |
| U4.79          | -1.25353509 | 4.433132105 | 0.047164353 | 0.545729532 |
| tRNA4-HisGTG   | -1.61899083 | 3.790696889 | 0.047553836 | 0.545729532 |
| U3.13          | -1.51261982 | 3.797771351 | 0.047790048 | 0.545729532 |
| RNU6-5         | -1.02972321 | 4.777615387 | 0.048416122 | 0.545729532 |
| SNORD36A       | -1.75616298 | 3.84054929  | 0.048459133 | 0.545729532 |
| tRNA1-LeuAAG   | -0.6699966  | 8.883794181 | 0.048648388 | 0.545729532 |
| RNU6-29        | -1.13048434 | 4.36662749  | 0.048793274 | 0.545729532 |

## Panel C

| putative microRNAs | Sequences                  | logFC     | logCPM   | PValue   | FDR      |
|--------------------|----------------------------|-----------|----------|----------|----------|
| put-miR-718        | TTCAGGTTACCGCAGG           | -6.825255 | 9.009089 | 1.21E-05 | 0.01609  |
| put-miR-594        | TGATTTTTTTTGCGCAA          | -8.122089 | 13.62184 | 4.24E-05 | 0.028197 |
| put-miR-703        | GACTGCTCGAGCTGCTT          | -4.582706 | 9.340091 | 0.000177 | 0.065276 |
| put-miR-477        | TGGGCAGCAAGAATGG           | -6.350308 | 8.65459  | 0.00021  | 0.065276 |
| put-miR-727        | GGAGGATTCAATTGG            | -4.944239 | 7.848316 | 0.000246 | 0.065276 |
| put-miR-646        | TCTGTATCGGCTGAGC           | -6.551056 | 8.808979 | 0.000322 | 0.065276 |
| put-miR-675        | TACCTCAATTCTCTAGG          | 5.756095  | 8.531088 | 0.000387 | 0.065276 |
| put-miR-319        | TGTCGGCGGGGCCCGGAC         | -3.557921 | 10.21937 | 0.000409 | 0.065276 |
| put-miR-327        | CATTCTCTGAAACTACA          | -6.062301 | 8.473821 | 0.000441 | 0.065276 |
| put-miR-338        | GACTTGTGATTAGCGG           | 5.013978  | 10.59887 | 0.000571 | 0.067661 |
| put-miR-1187       | GAGCATGTTGACTGGAGA         | -6.150807 | 8.514764 | 0.000634 | 0.067661 |
| put-miR-6          | GCGGACCTTGCTCAAGG          | 8.830503  | 11.10951 | 0.000659 | 0.067661 |
| put-miR-341        | TGAGAAAACATTTGAGG          | -5.709943 | 8.260643 | 0.000661 | 0.067661 |
| put-miR-750        | CAAGAGATGAGGAATG           | -5.585098 | 8.184314 | 0.000814 | 0.07204  |
| put-miR-183        | CCAGGCTGGTCGTGATGA         | -5.716867 | 8.806919 | 0.000855 | 0.07204  |
| put-miR-980        | TCGGAAGAAGAAGCTGACCCA      | -5.533531 | 8.158978 | 0.000866 | 0.07204  |
| put-miR-798        | TAACTCTGAAAATCTTGG         | -3.422593 | 9.962536 | 0.001016 | 0.075645 |
| put-miR-765        | AAAAAAGAGGGACAGAAATG       | -5.173073 | 7.963608 | 0.001123 | 0.075645 |
| put-miR-71         | GACCTTGGGTTGGGTCGTGGT      | -3.989796 | 8.732315 | 0.001131 | 0.075645 |
| put-miR-1327       | GAAAAGCAATCGTCACAG         | -7.093524 | 9.887535 | 0.001158 | 0.075645 |
| put-miR-371        | AATATTCAGCAGTCAGACTGG      | 6.778311  | 9.768186 | 0.001224 | 0.075645 |
| put-miR-354        | CAGGGTGATGACTTCTG          | -4.795128 | 7.781813 | 0.001302 | 0.075645 |
| put-miR-688        | GTGATGTCGGCTCATCGCAACCT    | 2.199185  | 10.66612 | 0.001307 | 0.075645 |
| put-miR-756        | TGAGGGATGTTGGATGCTCGCTTTGA | 2.032426  | 8.603553 | 0.001428 | 0.079215 |
| put-miR-1146       | CAACTGTAAGTCCATT           | 4.770832  | 9.196252 | 0.00158  | 0.079645 |
| put-miR-1333       | TAATTGCCTCTGGGG            | -4.794112 | 7.786171 | 0.001619 | 0.079645 |
| put-miR-511        | AAGCAGGCGTTACAATG          | -7.089632 | 9.54354  | 0.001631 | 0.079645 |
| put-miR-1199       | TGAACTCGGAGAAGGAAGT        | -2.994051 | 11.94621 | 0.001702 | 0.079645 |
| put-miR-705        | CCTGTCTGACTGGTCTCC         | 6.097356  | 9.460857 | 0.00175  | 0.079645 |
| put-miR-1275       | AAGAAGTAGACTGGATTGG        | -4.175643 | 7.541711 | 0.001817 | 0.079645 |
| put-miR-1204       | AGGGCTGGGCACGGGGG          | -3.329219 | 8.43806  | 0.00195  | 0.079645 |
| put-miR-857        | TAAGTGGGAGTGCTCATG         | 5.519775  | 8.389269 | 0.001957 | 0.079645 |
| put-miR-806        | CACGAGAGAACGCACACC         | 7.044016  | 9.996928 | 0.002048 | 0.079645 |
| put-miR-680        | GTTAAGTATGCACAGG           | 6.207669  | 9.293799 | 0.002048 | 0.079645 |
| put-miR-576        | TGGCATCCTGTCTCTTGC         | 5.455074  | 8.34397  | 0.002094 | 0.079645 |
| put-miR-444        | CTGAAAAGGGGACGGATTGGGAA    | -4.481465 | 8.254479 | 0.002327 | 0.083951 |

|              |                             |           |          |          |          |
|--------------|-----------------------------|-----------|----------|----------|----------|
| put-miR-1132 | CACGCTGTCTTTTGTCTCT         | -5.505609 | 11.5441  | 0.002357 | 0.083951 |
| put-miR-1025 | TGGAAGAGGGGAAAGGAGA         | -4.492628 | 7.660657 | 0.002418 | 0.083951 |
| put-miR-496  | CTAAGAGTATGAGTAGC           | 8.320903  | 10.63469 | 0.00246  | 0.083951 |
| put-miR-657  | TCAGGACATTGGACTCT           | -4.875422 | 9.301419 | 0.002633 | 0.087604 |
| put-miR-625  | GAGAAGACTGAATGCTCTCTC       | 5.988262  | 8.702871 | 0.002699 | 0.087604 |
| put-miR-40   | GCTGGAATAGCTCAGTTGC         | -4.339713 | 10.82143 | 0.00295  | 0.093474 |
| put-miR-666  | CAGCATCATGATCATTATGG        | 6.351541  | 8.967721 | 0.003077 | 0.095259 |
| put-miR-1098 | AAGGCGAAGGATATGTTG          | 7.117298  | 9.563651 | 0.003171 | 0.095916 |
| put-miR-538  | CATTGTGCTTCGTGGGAGAGTAGGGCA | -1.614431 | 8.767576 | 0.003422 | 0.101205 |
| put-miR-952  | GCCGACAGGTCCGGGTAA          | -5.048736 | 10.09864 | 0.003556 | 0.101506 |
| put-miR-572  | TAGATTCAGGAAGTCCA           | 7.280517  | 9.715353 | 0.003598 | 0.101506 |
| put-miR-972  | TTAGTAGAATTGTGTTGGGT        | -3.277557 | 9.430308 | 0.003661 | 0.101506 |
| put-miR-650  | AAAAGCAAGGCGAAGAGG          | -2.912473 | 9.278157 | 0.003775 | 0.102538 |
| put-miR-134  | CAGACTGCTCGAGCTGCTGC        | -3.339267 | 9.218851 | 0.003866 | 0.102908 |
| put-miR-975  | TTTGCAGACTGGAACT            | 5.625435  | 8.451316 | 0.004252 | 0.109356 |
| put-miR-161  | TGTCTGTAGCAATGTGCT          | -6.214205 | 9.449224 | 0.004553 | 0.109356 |
| put-miR-1265 | TGGGGATAAAGTTAGGT           | 3.433066  | 12.55135 | 0.004559 | 0.109356 |
| put-miR-968  | TGGCTGTTGCACTTCT            | 8.03171   | 10.36384 | 0.004661 | 0.109356 |
| put-miR-1125 | TTGAAGACTGGCTCTCA           | -4.530734 | 8.355286 | 0.00501  | 0.109356 |
| put-miR-892  | CAACGGTCTTGAAAACA           | 3.239723  | 8.81171  | 0.005015 | 0.109356 |
| put-miR-1306 | ATAACGTCATCTAGTGTG          | -4.744221 | 10.56016 | 0.005065 | 0.109356 |
| put-miR-948  | TGGAAGAAAACGAGGAG           | 5.807023  | 8.569858 | 0.005204 | 0.109356 |
| put-miR-925  | ATTTTGGTCTGTTGGTT           | 4.384338  | 8.643659 | 0.005342 | 0.109356 |
| put-miR-259  | ATGTAACCGGGCTTTTGTGCT       | -1.786601 | 8.598848 | 0.005378 | 0.109356 |
| put-miR-209  | GGTCTCGGATCGCC              | -4.053427 | 9.542155 | 0.005417 | 0.109356 |
| put-miR-773  | CAGGCAGAAGGAGCTTGT          | -2.64537  | 7.45467  | 0.005514 | 0.109356 |
| put-miR-910  | CACGTTCTTCTCATGGT           | -3.449747 | 7.34067  | 0.00564  | 0.109356 |
| put-miR-664  | AAAGTTGTGTTAGCTGA           | 5.719212  | 8.51182  | 0.005786 | 0.109356 |
| put-miR-1068 | TATGATTGTAAACTCTGA          | 5.890866  | 8.622725 | 0.005843 | 0.109356 |
| put-miR-265  | CACATGGGGGTAGAGCACTGACTGGG  | 2.110742  | 12.54113 | 0.005876 | 0.109356 |
| put-miR-490  | CTGCAGGAGTGTGTTGAGA         | 2.057932  | 11.07639 | 0.005969 | 0.109356 |
| put-miR-1155 | CAAATGATCAAAGCAGG           | 2.494173  | 8.354137 | 0.006008 | 0.109356 |
| put-miR-893  | ACCATCTCTGCTACCA            | -2.575152 | 8.358309 | 0.006075 | 0.109356 |
| put-miR-1342 | ATCGGAAAAATGTGGGAA          | 5.585468  | 8.418657 | 0.006226 | 0.109356 |
| put-miR-967  | AAATGCATTGGATATGG           | 7.085615  | 9.549591 | 0.006355 | 0.109356 |
| put-miR-811  | GTTGTAAAGCTCTGTTG           | 1.99226   | 9.063173 | 0.006362 | 0.109356 |
| put-miR-812  | GTCTGAGTTCTTTGTTGGA         | 7.523344  | 9.907158 | 0.006484 | 0.109356 |

|              |                             |           |          |          |          |
|--------------|-----------------------------|-----------|----------|----------|----------|
| put-miR-1084 | AGGACCATTGCGTTGCC           | 6.454871  | 9.04042  | 0.006577 | 0.109356 |
| put-miR-626  | TTCACTACTTTATCTCTTTT        | 2.849801  | 9.706572 | 0.006577 | 0.109356 |
| put-miR-127  | AGACTGTGATGACTGGGAGAGCGGGCT | -2.251745 | 7.719415 | 0.006585 | 0.109356 |
| put-miR-219  | GAGGCTCGAGAGCAATGGC         | 4.972872  | 8.410708 | 0.006604 | 0.109356 |
| put-miR-863  | AAGTTGGAGTATGTTTTAGG        | 4.174184  | 8.270046 | 0.006626 | 0.109356 |
| put-miR-33   | CCATGACTGCAGATGG            | -4.437318 | 8.062018 | 0.006671 | 0.109356 |
| put-miR-1246 | CTGGAGATCTGTTGGGC           | 6.389535  | 8.993512 | 0.00675  | 0.109356 |
| put-miR-126  | GTGGGGCTTAGTGCTGA           | -4.160086 | 8.05272  | 0.006849 | 0.109356 |
| put-miR-459  | GGGATCAACCTGACAA            | 7.00545   | 9.47012  | 0.00689  | 0.109356 |
| put-miR-907  | CCAACAGCTTCTGAGTTG          | -5.599664 | 9.28021  | 0.006923 | 0.109356 |
| put-miR-171  | GTCTGTGTCTTGTACGG           | 2.359948  | 10.86341 | 0.006942 | 0.109356 |
| put-miR-1163 | AGAGGACAGGAAGCTT            | 6.420538  | 9.017069 | 0.006996 | 0.109356 |
| put-miR-204  | AGAAGTCAGAACCTCTAT          | 6.610111  | 9.154177 | 0.007138 | 0.109356 |
| put-miR-498  | GACAGATTTTAGCTTGCC          | 2.214527  | 8.621153 | 0.007148 | 0.109356 |
| put-miR-286  | TAACAGGCGTTGAAATTGT         | 6.754071  | 9.266989 | 0.007468 | 0.112951 |
| put-miR-223  | GATGGGGGTAGAGCACTGC         | 2.25836   | 12.07399 | 0.007601 | 0.113671 |
| put-miR-75   | TGGGGATTGTGGGTCTC           | -2.009287 | 9.598075 | 0.00774  | 0.114174 |
| put-miR-548  | AGAGGACAGGAAGCT             | 6.104866  | 8.784136 | 0.007923 | 0.114174 |
| put-miR-1118 | AGAGGGTTCCTGTAGACCTAGGGAGGA | -2.053777 | 10.22693 | 0.007925 | 0.114174 |
| put-miR-943  | AGCCAGAGTCTGATTGTGAGTG      | -4.954652 | 9.727141 | 0.007978 | 0.114174 |
| put-miR-313  | TGAGTCTTTGGTCAGAA           | 6.693723  | 9.211486 | 0.00821  | 0.114289 |
| put-miR-659  | AGTAGCTGGTCGATTTGGC         | 6.996383  | 11.79431 | 0.008416 | 0.114289 |
| put-miR-210  | CTTCAGACTGTGAACTGA          | -2.997776 | 9.522779 | 0.008481 | 0.114289 |
| put-miR-144  | TAGAGATAGAGCTTATG           | 5.529267  | 8.376117 | 0.008489 | 0.114289 |
| put-miR-563  | TGGAGACATTAACCTATGA         | 5.915791  | 8.643491 | 0.008604 | 0.114289 |
| put-miR-1140 | TGGGAAGGGCTGCCGG            | -5.145788 | 9.310603 | 0.008606 | 0.114289 |
| put-miR-497  | TTGGTAGACTCTCACTT           | -4.014605 | 9.04369  | 0.008664 | 0.114289 |
| put-miR-573  | TGGATAACTCTTTTGTGA          | 6.440895  | 9.021507 | 0.008788 | 0.114289 |
| put-miR-906  | TATGGGAAGAATCTGGG           | 6.054559  | 8.747883 | 0.008793 | 0.114289 |
| put-miR-231  | TATGTCATGGTGGCTTTGG         | -2.9467   | 8.39848  | 0.008918 | 0.114289 |
| put-miR-85   | GAATCCCACTTCTGACACCA        | -2.952626 | 7.663083 | 0.00901  | 0.114289 |
| put-miR-884  | ATGGTCTAGAGCTACAGGT         | 5.870477  | 8.628199 | 0.00911  | 0.114289 |
| put-miR-918  | CAGCTTCTCCGCTTCTT           | 5.860051  | 8.60284  | 0.009174 | 0.114289 |
| put-miR-985  | GTAATGCATCTCTGCA            | 5.898607  | 8.628545 | 0.009188 | 0.114289 |
| put-miR-320  | ACTGGATCCAAGAAAAG           | -2.920156 | 8.226536 | 0.009571 | 0.11795  |
| put-miR-67   | AGGACGTTGGTCAGAGC           | -2.895467 | 7.636799 | 0.009857 | 0.119419 |
| put-miR-221  | TCTCTCAATCCTCTTGG           | 5.954163  | 8.658651 | 0.009869 | 0.119419 |

|              |                            |           |          |          |          |
|--------------|----------------------------|-----------|----------|----------|----------|
| put-miR-471  | AGAAGCAGAGAACGAGG          | -3.987795 | 8.44957  | 0.009973 | 0.119585 |
| put-miR-1352 | TGGATTGTGGGGGAACC          | 5.478958  | 8.36409  | 0.010086 | 0.119857 |
| put-miR-610  | AGGAGATATAGCTCTTGT         | 5.722079  | 8.518132 | 0.010392 | 0.122408 |
| put-miR-48   | AAAATGGATTCTGAACCA         | 5.632443  | 8.450136 | 0.010602 | 0.123785 |
| put-miR-529  | TGACCTTTTGCCTTCTGC         | 5.426419  | 8.338572 | 0.010802 | 0.125018 |
| put-miR-424  | TAAAAAGTTCTCTGTTTTTC       | -2.78953  | 7.208748 | 0.010937 | 0.12549  |
| put-miR-24   | TTGGTGCATCTGTAGTCCAAC      | -4.932824 | 10.24045 | 0.011113 | 0.126418 |
| put-miR-164  | TGAAATTCTAAATATTGCA        | 5.725561  | 8.51014  | 0.011372 | 0.126957 |
| put-miR-229  | TGGGATTAGCTCAGC            | 3.799609  | 8.12666  | 0.011424 | 0.126957 |
| put-miR-525  | AAGTGGGAAGGCCAGA           | -3.723862 | 8.317629 | 0.011446 | 0.126957 |
| put-miR-325  | TTCAAATCCCCTTCTGACACCA     | -2.927094 | 7.781125 | 0.012443 | 0.136691 |
| put-miR-188  | AAATGGCGATACTCAGG          | 6.335286  | 9.481014 | 0.012559 | 0.136691 |
| put-miR-1066 | TGCTTTGATCGTAGCCC          | -3.205461 | 7.447675 | 0.012632 | 0.136691 |
| put-miR-1295 | GAGGTTAGGATATCTGGCT        | -3.324069 | 7.580857 | 0.012893 | 0.13839  |
| put-miR-588  | TTTTGAACGTTCTTTCTT         | 1.985563  | 8.910298 | 0.013328 | 0.141683 |
| put-miR-1273 | AAGGGGAGGAATTTACGTG        | 4.845324  | 8.579749 | 0.013413 | 0.141683 |
| put-miR-783  | AAGGAAAAAGCGGATA           | -3.722555 | 7.559427 | 0.013621 | 0.14275  |
| put-miR-37   | TGGTGGAGTGAAGACG           | -4.836261 | 8.547591 | 0.014174 | 0.14647  |
| put-miR-1317 | TGGAGTGTGGATTGGGG          | 1.625507  | 8.870365 | 0.014196 | 0.14647  |
| put-miR-97   | CTGCGTGGCTCTGACAC          | 3.27664   | 9.296956 | 0.014347 | 0.146889 |
| put-miR-1016 | AGGTAAGCTCATGAGG           | -2.141009 | 9.304303 | 0.014567 | 0.148003 |
| put-miR-546  | CCAAGGGTTGTAGGGCCACT       | 3.880018  | 10.64815 | 0.015027 | 0.15152  |
| put-miR-1099 | AGACTCCTTTATCGTA           | 4.881265  | 8.359673 | 0.015178 | 0.151894 |
| put-miR-874  | ATGAGCATTGATTAGG           | -4.133563 | 8.481847 | 0.015742 | 0.15277  |
| put-miR-701  | TTGAGATTGAGGGGCCCT         | 2.361165  | 8.446935 | 0.015782 | 0.15277  |
| put-miR-279  | CTGTGAAGCCTGTTGGTTTGCTGCTG | -2.002787 | 8.036423 | 0.015783 | 0.15277  |
| put-miR-184  | TGCTGAACCTCTGTATGT         | 5.624113  | 9.598097 | 0.015798 | 0.15277  |
| put-miR-495  | CAGGGAGTGAAGAGAATT         | -2.791411 | 9.973484 | 0.015923 | 0.15277  |
| put-miR-90   | GAAGTAAATCCTTGGG           | 3.643929  | 8.886684 | 0.016047 | 0.15277  |
| put-miR-468  | ATAAGGAACTGCTCTCTC         | 4.936942  | 8.333361 | 0.016099 | 0.15277  |
| put-miR-469  | GCGGGGATTAGCTCAGCTGGG      | 1.223156  | 14.10575 | 0.016186 | 0.15277  |
| put-miR-1195 | ATTCTTTGACATGCAGAT         | 2.561114  | 9.286221 | 0.016299 | 0.15277  |
| put-miR-250  | CTGGTGTAGAATTGAGG          | -4.411037 | 8.166635 | 0.016733 | 0.153408 |
| put-miR-1264 | CAGGTTTCAGACTTTAGG         | 2.452989  | 9.271027 | 0.0168   | 0.153408 |
| put-miR-465  | CCAGTTGTCGTGGGTTTTT        | 2.030242  | 8.962972 | 0.016867 | 0.153408 |
| put-miR-1243 | TGTGGATTTTGTTCATGT         | 4.743252  | 8.639084 | 0.016871 | 0.153408 |
| put-miR-771  | CCTTGATCTGACTGGGGGCC       | -1.886812 | 8.602159 | 0.016943 | 0.153408 |



|              |                             |           |          |          |          |
|--------------|-----------------------------|-----------|----------|----------|----------|
| put-miR-534  | CTGTTGGAGAATTTGGAATATTAGGT  | -4.34848  | 8.658536 | 0.01741  | 0.155563 |
| put-miR-80   | GAAGAGGGAGTGGTCTGTAAATGCG   | 6.380693  | 9.533096 | 0.017415 | 0.155563 |
| put-miR-347  | AAAGGGAAACAAGAATTCTT        | 1.937026  | 10.57284 | 0.017748 | 0.156927 |
| put-miR-410  | GGAGAATAGAACATGCTGATT       | 6.652715  | 9.666187 | 0.017824 | 0.156927 |
| put-miR-891  | TAAATGTTGGTTTGT             | 1.858836  | 8.369573 | 0.017921 | 0.156927 |
| put-miR-189  | GAGCGAAACGGCAGGAT           | -2.368257 | 8.305643 | 0.018423 | 0.160266 |
| put-miR-842  | ACCCGGAGAACTGAACT           | -2.045068 | 9.280359 | 0.01862  | 0.160514 |
| put-miR-81   | ATTTGAAAGAATGCTTG           | 2.468711  | 8.296721 | 0.018693 | 0.160514 |
| put-miR-824  | CTAGCTGAACCTCTGTAT          | 5.277761  | 8.805933 | 0.018935 | 0.161554 |
| put-miR-958  | ACAGGGCTGTGCAAAAA           | 3.475245  | 8.121044 | 0.019332 | 0.163891 |
| put-miR-742  | CAGGGCTGTGCTAACT            | 2.255055  | 7.794269 | 0.020414 | 0.171266 |
| put-miR-605  | TGAGCTTTGGAAGAAGGACCA       | -2.303646 | 8.016644 | 0.020459 | 0.171266 |
| put-miR-374  | TGTGAGGATGTTCTGTAAGGAGTGTT  | 4.607626  | 8.644756 | 0.020848 | 0.173428 |
| put-miR-135  | TGAATTACGGAAGTGTGGTTAAT     | -3.311813 | 7.404022 | 0.021756 | 0.179859 |
| put-miR-323  | ATAAAATGGGCGTTGAGG          | 3.262325  | 8.71569  | 0.022489 | 0.184771 |
| put-miR-506  | AAGAGGGGCTTTTGAACCC         | 6.174059  | 11.22955 | 0.022884 | 0.186859 |
| put-miR-293  | GGGTAATACTGCAGTGGGCGTTGGTAG | -1.800636 | 10.99339 | 0.02336  | 0.189584 |
| put-miR-524  | CGTGGTGATGCTCTGACA          | -2.434924 | 7.973262 | 0.023561 | 0.189632 |
| put-miR-517  | TTGGGAAGGGCTGCCGGA          | -4.206993 | 8.774926 | 0.023651 | 0.189632 |
| put-miR-391  | ATCTCGATCCAGTAGTC           | 1.801909  | 7.884667 | 0.024454 | 0.194897 |
| put-miR-92   | AGAGACTGACTTTGAGTA          | 5.755643  | 9.030306 | 0.025075 | 0.198658 |
| put-miR-435  | TTTAGACCGTTTTTATGTC         | -3.735696 | 9.202301 | 0.027033 | 0.212767 |
| put-miR-1080 | TGTGGATTGATGCTCT            | -1.707634 | 8.549845 | 0.027175 | 0.212767 |
| put-miR-587  | TTGTAGAAGAGGAAGCG           | -2.497802 | 8.421284 | 0.029781 | 0.231807 |
| put-miR-1220 | TAGAATGGGCTTGTGTC           | 3.980805  | 8.446505 | 0.030296 | 0.233459 |
| put-miR-1134 | AAAGAATGAAGTTGGTCTGG        | -1.684102 | 8.848135 | 0.030344 | 0.233459 |
| put-miR-352  | TAATGAATGACTGTTTG           | 1.774841  | 8.080119 | 0.030753 | 0.23524  |
| put-miR-1162 | AAAGAACGTTCAAAGG            | 2.807352  | 8.476403 | 0.030994 | 0.235731 |
| put-miR-377  | AAAGGGCTTTGACTATTT          | 1.681479  | 13.05617 | 0.031488 | 0.237918 |
| put-miR-294  | TGCTTCTCAATCGGT             | 3.603279  | 8.466728 | 0.031639 | 0.237918 |
| put-miR-1229 | ACAGTAGCAATGTTCTGC          | 3.278472  | 7.88184  | 0.032091 | 0.238095 |
| put-miR-1091 | GATTATGATTGTGATTGTAGC       | 4.964642  | 9.493873 | 0.032144 | 0.238095 |
| put-miR-419  | AAAAAGTTAGACTTAGG           | 1.437457  | 9.015693 | 0.032199 | 0.238095 |
| put-miR-249  | GCCAGGATGTTGGCTTA           | -1.617688 | 9.173125 | 0.03244  | 0.238442 |
| put-miR-122  | GGAACCTCATGATTGTTGACTTTGG   | -1.814811 | 8.353927 | 0.032687 | 0.238442 |
| put-miR-1320 | TTAGAGGCCACTCAAT            | 4.820365  | 8.331847 | 0.032994 | 0.238442 |
| put-miR-335  | TATTTAAATGAGAACTTTGAAGC     | 2.147361  | 9.043008 | 0.033061 | 0.238442 |

|              |                             |           |          |          |          |
|--------------|-----------------------------|-----------|----------|----------|----------|
| put-miR-166  | CGTTTTGGTGTGGTTG            | -3.72297  | 8.052795 | 0.033142 | 0.238442 |
| put-miR-1172 | AGAACCAAGAAGCTCTGG          | 2.612818  | 8.384166 | 0.034733 | 0.246677 |
| put-miR-1207 | GTGAAAAGACATAGGGGG          | 1.882735  | 9.817827 | 0.034763 | 0.246677 |
| put-miR-1130 | TAGAAGAGGAGCTTCTTT          | 2.429349  | 9.717761 | 0.034842 | 0.246677 |
| put-miR-247  | AGAGCTAGAATCCAGG            | 1.990242  | 8.786356 | 0.035469 | 0.249784 |
| put-miR-246  | TTTATTAGAGACGGACTTT         | 4.838701  | 8.30995  | 0.035789 | 0.250379 |
| put-miR-870  | AAAGGATGTAGACAAGGGA         | 1.480442  | 8.130793 | 0.03593  | 0.250379 |
| put-miR-704  | CAATGAATATCTGGGA            | 2.582114  | 8.282107 | 0.037366 | 0.258799 |
| put-miR-266  | TTTAGGTACTCTGAACAA          | 2.505244  | 8.581082 | 0.037586 | 0.258799 |
| put-miR-928  | CACAGAAGGAACGTTTAGA         | 2.539814  | 8.530779 | 0.037862 | 0.258799 |
| put-miR-959  | GAAAGAGAGTGAGACTCA          | 2.359451  | 8.451334 | 0.038062 | 0.258799 |
| put-miR-676  | TGGTGGTTGGTTTGGG            | -1.247728 | 9.504279 | 0.03818  | 0.258799 |
| put-miR-1095 | ATTGTGAATGATCTGG            | 4.006586  | 8.691739 | 0.038403 | 0.258799 |
| put-miR-550  | GCACTCTGGACTCTGAATCC        | -1.460704 | 9.782298 | 0.038501 | 0.258799 |
| put-miR-835  | TTAGGAGTAGGTTACT            | 1.888177  | 8.674219 | 0.038693 | 0.258799 |
| put-miR-686  | TGACTGTTTTATATGAGTAA        | 1.693385  | 10.42287 | 0.038917 | 0.258993 |
| put-miR-32   | ATCCCGACGAGCCCCATTA         | -1.878608 | 11.03059 | 0.039456 | 0.260368 |
| put-miR-151  | TTGAAACTGATATACTGTCTTAGG    | -2.781416 | 7.308382 | 0.039515 | 0.260368 |
| put-miR-726  | GATGGGCTGATTGAGGGAT         | 3.117005  | 10.49059 | 0.039816 | 0.261058 |
| put-miR-256  | ATGAGGCTGAGATTGTCC          | 1.962535  | 8.272489 | 0.040595 | 0.264863 |
| put-miR-368  | AATGAGAACTTTGAAGCCGAAG      | 2.363048  | 14.35762 | 0.041097 | 0.266314 |
| put-miR-1232 | ACAGACTGTCTTTGGG            | 2.165428  | 8.620526 | 0.041263 | 0.266314 |
| put-miR-1219 | GAAATTATTGATCCAGTCACGA      | 1.298803  | 9.720145 | 0.041418 | 0.266314 |
| put-miR-1276 | GAAGAGTTGATCCATG            | -1.907277 | 9.309298 | 0.041682 | 0.266725 |
| put-miR-1119 | GTTTTGGTTGAGTGAGGA          | -2.455642 | 8.629875 | 0.042052 | 0.267807 |
| put-miR-901  | GTCTATTGGATTATCGTC          | 1.728483  | 8.113002 | 0.042255 | 0.267816 |
| put-miR-356  | GTTTGAATTGGGAAGCTGGGGG      | -1.750022 | 8.007003 | 0.043232 | 0.272707 |
| put-miR-856  | AAGGATAGGAGGTATTT           | 2.182062  | 8.400665 | 0.044086 | 0.276787 |
| put-miR-1244 | CAGTTGGTAGAGCACCTGAC        | -1.24774  | 10.46658 | 0.045019 | 0.281317 |
| put-miR-476  | GTGGTCAGGTAGAGAA            | -1.919551 | 8.047207 | 0.046618 | 0.288241 |
| put-miR-142  | CAGTATAATTAGGGGTTAATTGTGGGA | 1.249016  | 8.70991  | 0.046684 | 0.288241 |
| put-miR-639  | TGGAGTGTGGATTGGG            | 1.474835  | 8.945467 | 0.046777 | 0.288241 |
| put-miR-622  | TGAGTGGTCAATGGGGG           | -1.336255 | 8.590784 | 0.047597 | 0.291931 |
| put-miR-337  | TGGGCTCAAGCTTTCTCT          | -2.374139 | 8.27944  | 0.047999 | 0.291931 |
| put-miR-422  | TTTAGGGTTTTAAGGTGTTA        | 1.290525  | 11.98963 | 0.048034 | 0.291931 |
| put-miR-1339 | GGACTGAGAGCTCTTCTG          | 3.091573  | 10.60449 | 0.048448 | 0.293113 |
| put-miR-1356 | GTGCTGCATGGCTGTCA           | -1.345358 | 8.820822 | 0.049044 | 0.295237 |

|              |                           |           |          |          |          |
|--------------|---------------------------|-----------|----------|----------|----------|
| put-miR-29   | GAGATTTACGACCTAGG         | 1.337942  | 9.63023  | 0.049243 | 0.295237 |
| put-miR-128  | TGGCTCTGACACTAGTA         | 2.165955  | 8.272955 | 0.049525 | 0.295593 |
| put-miR-359  | GAAGTGGAAGGACTATGAA       | 2.152809  | 8.475685 | 0.050666 | 0.301056 |
| put-miR-1003 | TGGACTTCAGAACAGC          | 4.029771  | 7.874318 | 0.050924 | 0.301242 |
| put-miR-238  | AGAGACAGGAACCTTGATTTT     | 3.690637  | 8.383615 | 0.051316 | 0.302217 |
| put-miR-961  | TAGCTTGATCCAGTTG          | 2.181109  | 9.760789 | 0.052445 | 0.307507 |
| put-miR-751  | AGGCTGAGACTGGACAGAAAGACCT | -1.317479 | 8.022761 | 0.053486 | 0.312239 |
| put-miR-1184 | GCCTGCCCGGTGCTGGT         | 1.707305  | 8.999909 | 0.053825 | 0.312845 |
| put-miR-379  | GCGTGTGCGCGGGAGG          | 2.352869  | 7.584474 | 0.054246 | 0.313921 |
| put-miR-361  | CAGGTGAAATCGTGGATGT       | 2.224017  | 10.34793 | 0.05535  | 0.318896 |
| put-miR-1111 | TGATGCGTTGGGATGTAGC       | -1.424105 | 8.543294 | 0.055717 | 0.318896 |
| put-miR-938  | TTAGGAAGCTGCTGATT         | -1.317019 | 9.281869 | 0.055825 | 0.318896 |

**eTable 2: List of 63 biomarkers validated in qPCR and used for statistical comparisons**

Panel A (23 microRNAs)

| microRNAs       | Gene Number  |
|-----------------|--------------|
| hsa-let-7f-5p   | MIMAT0000067 |
| hsa-miR-1246    | MIMAT0005898 |
| hsa-miR-135b-5p | MIMAT0000758 |
| hsa-miR-21-5p   | MIMAT0000076 |
| hsa-miR-425-5p  | MIMAT0003393 |
| hsa-miR-497-5p  | MIMAT0002820 |
| hsa-miR-148a-3p | MIMAT0000243 |
| hsa-let-7a-5p   | MIMAT0000062 |
| hsa-let-7i-5p   | MIMAT0000415 |
| hsa-miR-143-3p  | MIMAT0000435 |
| hsa-miR-34b-3p  | MIMAT0004676 |
| hsa-miR-144-3p  | MIMAT0000436 |
| hsa-miR-16-1-3p | MIMAT0004489 |
| hsa-miR-103a-3p | MIMAT0000101 |
| hsa-miR-92a-3p  | MIMAT0000092 |
| hsa-let-7b-5p   | MIMAT0000063 |

|                 |              |
|-----------------|--------------|
| hsa-miR-142-5p  | MIMAT0000433 |
| hsa-miR-29c-3p  | MIMAT0000433 |
| has-miR-339-5p  | MIMAT0000764 |
| has-miR-107     | MIMAT0000104 |
| hsa-miR-126-3p  | MIMAT0000445 |
| hsa-miR-1271-5p | MIMAT0005796 |
| hsa-miR-143-3p  | MIMAT0000435 |

## Panel B (29 small non-coding RNAs)

| small non coding RNAs | Chr | Strand | Start     | Stop      | Sequence                                            |
|-----------------------|-----|--------|-----------|-----------|-----------------------------------------------------|
| RNU4-6p               | X   | -      | 16893269  | 16893390  | TATCGTAGCCAATGAGGTTTATCCGAGGCGTGATTATTGCTAATTGAAAA  |
| tRNA18ArgCCT          | 17  | +      | 73030001  | 73030073  | GCACTGGCCTCCTAAGCCAGGGATTGTGGGTTTCGAGTCCCACCTGGGGTA |
| U6.428                | 1   | +      | 180727858 | 180727953 | AAGATTAGCATGAGGATGACACGCAAATTCGTGAAGCGTCCATTTCTTT   |
| RNU6-45               | 11  | +      | 63737942  | 63738048  | GGCCCTTGTGCAAGGATGACACGCAAATTCGTGAAGCGTCCATATTTTT   |
| RNU6-4                | 1   | -      | 31970419  | 31970525  | GGCCCCTGCACAGGGATGACACGCAAATTCGTGAAGCGTCCATATTTTT   |
| RNU6-6                | 2   | +      | 201694732 | 201694839 | GGCCCCTGTGCAAGGATGACACGCAAATTCGTGAAGCGTCCATATTTTT   |
| RNU6-7                | 3   | +      | 194935516 | 194935622 | GGCCCCTGCGCAAGGATGACATGCAAATTCGTGAAGCGTCCATATTTTT   |
| RNU6-73               | 13  | +      | 28402900  | 28403006  | GGCCCCTGTGCAAGGATGACATGCAAATTCGTGAAGCGTCCATATTTTT   |
| SNORD3B               | 17  | +      | 18965225  | 18965440  | CTTCTCCTCGTATTGGGGAGTGAGAGGGAGAGAACCGCGTCTGAGTGGTT  |
| tRNA120-AlaAGC        | 6   | -      | 28626014  | 28626085  | GCGCATGCTTAGCATGCATGAGGTCCCGGTTTCGATCCCCAGCATCTCCA  |
| tRNA73-ArgCCG         | 6   | +      | 28849165  | 28849237  | GCGTCTGATTCCGGATCAGAAGATTGAGGGTTCGAGTCCCTTCGTGGTCG  |
| U6.168                | 6   | -      | 18307204  | 18307310  | ATGGCCCCTGCGCAAGGATGACACGCAAATTTGTGAAGGATCCATATTT   |
| U6.375                | 4   | +      | 109573306 | 109573412 | GGCCCCTGTGCAAGAATGACTCGCAAATTCGTGAAGCGTCCATATTTTT   |
| YRNA-684              | 18  | +      | 20604559  | 20604666  | GCTTCTTTTACTCTTCCCTTCATTTCTACTACTGTACCTGATTCGTCTT   |
| U6.601                | 19  | -      | 39287642  | 39287749  | GGCCCCTGCGCAAGGATGACATGCAAATTTGTGAAGTGTCCATATTTTT   |
| YRNA-255              | 17  | +      | 80375102  | 80375197  | GUGUACCAACGUUGGUUAUACAACCCCCACAACUAAAUUUGACUGGCUU   |
| tRNA9-TyrGTA          | 7   | +      | 149255133 | 149255205 | CTTTTTGACTGTAGAGCAAGAGGTCCCTGGTTCAAATCCAGTTCCTCCT   |
| U2.3                  | 1   | +      | 150209315 | 150209504 | TCACTTCACGCATCGATCTGGTATTGACAGTACCTCCAGGAACAGTGCACC |
| U4.64                 | 9   | +      | 36267780  | 36267919  | GTATCGTAGCCAATGAGGTTTATCCAAGGTGCGGATTATTGCTAATTGAAA |
| SNORA57               | 10  | +      | 27077946  | 27078086  | TGCTGGCGGCTTCCCATCCGCTGGTCTATCTCAAACGCCGGGACACCG    |
| UC022CJG1             | Y   | +      | 10037846  | 10037870  | CATTGATCATCGACACTTCGAACGCACTTG                      |
| tRNA27-MetCAT         | 6   | +      | 26766444  | 26766516  | GCGTCAGTCTCATAATCTGAAGGTCTGAGTTCGAGCCTCAGAGAGGGCA   |
| tRNA8-ThrAGT          | 17  | +      | 8090478   | 8090551   | GCGCCTGTCTAGTAAACAGGAGATCTGGGTTTCGAATCCCAGCGGTGCTT  |
| tRNA2-LeuTAA          | 4   | -      | 156384978 | 156385052 | GCATAAACTTAAATTTTATAATCAGAGGTTCAACTCCTCTTCTTAACA    |
| YRNA-245              | 2   | -      | 25919945  | 25920057  | GCTTTTGTGAACCTTTCCCTCTTCTATTACTGTACTTGACCAGTCT      |
| snoU13.120            | 4   | +      | 17530560  | 17530663  | GCTACCCTGGAACCTTGTATGACATCTGCACATTACCCATCTGACCTGA   |
| U6.1249               | 1   | +      | 67661823  | 67661926  | GATGGCATGACCCCTGATCAAGGACGCGCATGCAAATTTGTGAAGTATTC  |
| tRNA84-GluTCC         | 1   | -      | 1.61E+08  | 1.61E+08  | TTTACC CGCCGGCCGGGTTTCGATTC CCGGTCAGGGAA            |
| tRNA8-AlaTGC          | 12  | +      | 1.25E+08  | 1.25E+08  | TGCACGTATGAGGCCCCGGGTTCAATCCCCGCATCTCCA             |

## Panel C (11 putative microRNAs)

| Putative miRs | Chr | Strand | Start    | Stop     | Sequence            |
|---------------|-----|--------|----------|----------|---------------------|
| put-miR-1204  | 4   | +      | 1661740  | 1661756  | AGGGCTGGGCACGGGGG   |
| put-miR-1207  | X   | +      | 12647513 | 12647530 | GTGAAAAGACATAGGGGG  |
| put-miR-465   | 2   | +      | 29475435 | 29475453 | CCAGTTGTCGTGGGTTTTT |
| put-miR-6     | 16  | +      | 67911172 | 67911188 | GCGGACCTTGCTCAAGG   |

|              |    |   |           |           |                          |
|--------------|----|---|-----------|-----------|--------------------------|
| put-miR-325  | 3  | + | 193330821 | 193330843 | TTCAAATCCCACCTTCTGACACCA |
| put-miR-1146 | 5  | + | 67892184  | 67892199  | ATAGGAGACTTCTATC         |
| put-miR-742  | 16 | + | 49579869  | 49579884  | CAGGGCTGTGCTAACT         |
| put-miR-476  | 4  | + | 100244534 | 100244549 | GTGGTCAGGTAGAGAA         |
| put-mir-893  | 5  | + | 58317814  | 58317830  | ACCATCCTCTGCTACCA        |
| put-miR-594  | 17 | + | 46822348  | 46822364  | TGATTTTTTTTGGCGAA        |
| put-miR-1130 | 2  | + | 1.13E+08  | 1.13E+08  | TAGAAGAGGGAGCTTCTTT      |

**eTable 3: Univariate analysis of comparisons at time point T1**

AUC, CI, count,  $\Delta Cq$  average, SD,  $\Delta \Delta Cq$ , fold change, t-test p value and power analysis for the comparison of individual biomarkers between HIA+ and HIA- in season 1. Samples were not collected from Uninjured and MSK groups at this time point.

| HIA+ vs HIA-    | AUC  | 95% Confidence interval | Count | Average $\Delta Cq$ HIA+ | Average $\Delta Cq$ HIA- | SD HIA+ | SD HIA- | $\Delta \Delta Cq$ (HIA+) - (HIA-) | Fold change HIA+ / HIA- | t-test p-value Season 1 | Power analysis (p = 0.05) |
|-----------------|------|-------------------------|-------|--------------------------|--------------------------|---------|---------|------------------------------------|-------------------------|-------------------------|---------------------------|
| hsa-miR-103a-3p | 0.66 | 0.53-0.78               | 43/32 | -20.11                   | -20.45                   | 0.57    | 0.65    | 0.34                               | 1.27                    | 0.023                   | 177                       |
| hsa-miR-126-3p  | 0.71 | 0.58-0.84               | 37/28 | -13.48                   | -14.56                   | 1.19    | 1.89    | 1.08                               | 2.11                    | 0.012                   | 108                       |
| hsa-miR-144-3p  | 0.67 | 0.54-0.79               | 40/30 | -14.46                   | -16.19                   | 2.24    | 3.12    | 1.73                               | 3.32                    | 0.008                   | 124                       |
| hsa-miR-34b-3p  | 0.65 | 0.51-0.78               | 36/30 | -13.93                   | -14.96                   | 1.51    | 2.22    | 1.03                               | 2.04                    | 0.029                   | 173                       |
| hsa-miR-92a-3p  | 0.66 | 0.53-0.78               | 42/33 | -20.57                   | -20.86                   | 0.59    | 0.55    | 0.29                               | 1.22                    | 0.039                   | 304                       |

**eTable 4: Univariate analysis of comparisons at time point T2**

AUC, CI, count,  $\Delta Cq$  average, SD,  $\Delta \Delta Cq$ , fold change, t-test p value and power analysis for each comparison of individual biomarkers between HIA+ and Uninjured, HIA- and MSK groups in season 1. T-test p values of season 2 are also reported when found  $\leq 0.05$

| HIA+ vs Uninjured (U) | AUC  | 95% Confidence interval | Count | Average $\Delta Cq$ HIA+ | Average $\Delta Cq$ U | SD HIA+ | SD U | $\Delta \Delta Cq$ (HIA+) - U | Fold change HIA+ / U | t-test p-value Season 1 | Power analysis (p = 0.05) | t-test p-value Season 2 |
|-----------------------|------|-------------------------|-------|--------------------------|-----------------------|---------|------|-------------------------------|----------------------|-------------------------|---------------------------|-------------------------|
| hsa-let-7f-5p         | 0.70 | 0.60-0.78               | 53/62 | -16.24                   | -17.22                | 1.30    | 1.32 | 0.98                          | 1.97                 | 0.000                   | 96                        |                         |
| hsa-let-7a-5p         | 0.70 | 0.59-0.77               | 53/62 | -20.09                   | -20.36                | 0.49    | 0.37 | 0.27                          | 1.21                 | 0.001                   | 139                       | 0.031                   |
| hsa-let-7i-5p         | 0.65 | 0.55-0.73               | 53/62 | -18.49                   | -18.72                | 0.42    | 0.49 | 0.23                          | 1.17                 | 0.010                   | 234                       |                         |
| hsa-miR-135b-5p       | 0.68 | 0.58-0.76               | 50/61 | -14.17                   | -14.80                | 0.90    | 0.97 | 0.63                          | 1.55                 | 0.001                   | 122                       |                         |
| hsa-miR-34b-3p        | 0.75 | 0.66-0.83               | 34/45 | -12.33                   | -13.99                | 2.02    | 2.46 | 1.66                          | 3.16                 | 0.002                   | 104                       | 0.046                   |
| RNU6-4                | 0.67 | 0.57-0.76               | 53/61 | -19.90                   | -21.00                | 2.19    | 1.78 | 1.1                           | 2.14                 | 0.004                   | 181                       |                         |
| RNU6-45               | 0.66 | 0.56-0.75               | 53/62 | -18.86                   | -19.90                | 2.19    | 2.20 | 1.04                          | 2.06                 | 0.013                   | 250                       | 0.016                   |
| RNU6-6                | 0.65 | 0.56-0.74               | 53/61 | -19.79                   | -20.73                | 2.00    | 1.79 | 0.94                          | 1.92                 | 0.009                   | 228                       | 0.051                   |
| RNU6-7                | 0.64 | 0.55-0.73               | 53/62 | -19.82                   | -20.74                | 2.01    | 1.78 | 0.92                          | 1.89                 | 0.010                   | 236                       |                         |
| RNU6-73               | 0.65 | 0.55-0.73               | 53/62 | -19.76                   | -20.65                | 1.87    | 1.80 | 0.89                          | 1.85                 | 0.011                   | 238                       |                         |
| SNORD3B-2             | 0.65 | 0.55-0.74               | 53/62 | -19.25                   | -19.83                | 1.62    | 1.24 | 0.58                          | 1.49                 | 0.033                   | 321                       |                         |

| HIA+ vs HIA-    | AUC  | 95% Confidence interval | Count | Average $\Delta$ q HIA+ | Average $\Delta$ q HIA- | SD HIA+ | SD HIA- | $\Delta\Delta$ q (HIA+) - (HIA-) | Fold change HIA+ / HIA- | t-test p-value Season 1 | Power analysis (p = 0.05) | t-test p-value Season 2 |
|-----------------|------|-------------------------|-------|-------------------------|-------------------------|---------|---------|----------------------------------|-------------------------|-------------------------|---------------------------|-------------------------|
| YRNA-255        | 0.63 | 0.53-0.72               | 53/62 | -22.71                  | -24.48                  | 1.77    | 1.67    | 1.77                             | 3.41                    | 0.018                   | 287                       |                         |
| hsa-miR-103a-3p | 0.61 | 0.52-0.70               | 53/60 | -19.70                  | -20.08                  | 0.88    | 0.77    | 0.38                             | 1.30                    | 0.018                   | 255                       |                         |
| U6.375          | 0.63 | 0.53-0.72               | 53/62 | -16.38                  | -17.03                  | 1.77    | 1.47    | 0.65                             | 1.57                    | 0.034                   | 349                       |                         |
| U6.601          | 0.62 | 0.53-0.72               | 53/62 | -18.17                  | -18.94                  | 1.96    | 1.76    | 0.77                             | 1.71                    | 0.028                   | 329                       |                         |
| YRNA-684        | 0.63 | 0.53-0.72               | 46/56 | -12.30                  | -11.10                  | 2.68    | 2.73    | -1.2                             | 0.44                    | 0.028                   | 254                       |                         |
| hsa-miR-107     | 0.59 | 0.49-0.68               | 53/62 | -19.30                  | -19.61                  | 0.93    | 0.73    | 0.31                             | 1.24                    | 0.047                   | 150                       |                         |
| hsa-let-7a-5p   | 0.76 | 0.65-0.87               | 53/25 | -20.09                  | -20.55                  | 0.49    | 0.41    | 0.46                             | 1.38                    | 0.000                   | 60                        |                         |
| hsa-let-7f-5p   | 0.89 | 0.82-0.96               | 53/25 | -16.24                  | -17.90                  | 1.29    | 0.56    | 1.66                             | 3.16                    | 0.000                   | 26                        |                         |
| hsa-let-7i-5p   | 0.74 | 0.62-0.86               | 53/25 | -18.49                  | -18.81                  | 0.41    | 0.49    | 0.32                             | 1.25                    | 0.004                   | 87                        |                         |
| hsa-miR-103a-3p | 0.73 | 0.60-0.85               | 53/25 | -19.70                  | -20.33                  | 0.88    | 0.63    | 0.63                             | 1.55                    | 0.002                   | 91                        | 0.045                   |
| hsa-miR-107     | 0.71 | 0.59-0.83               | 53/25 | -19.30                  | -19.80                  | 0.93    | 0.52    | 0.5                              | 1.41                    | 0.014                   | 141                       |                         |
| has-miR-1246    | 0.63 | 0.50-0.76               | 53/25 | -21.39                  | -20.79                  | 1.33    | 1.02    | -0.6                             | 0.66                    | 0.031                   | 200                       |                         |
| has-miR-135b-5p | 0.81 | 0.71-0.91               | 50/25 | -14.17                  | -15.08                  | 0.90    | 0.51    | 0.91                             | 1.88                    | 0.000                   | 44                        |                         |
| hsa-miR-144-3p  | 0.69 | 0.56-0.82               | 42/24 | -14.19                  | -15.87                  | 2.60    | 2.73    | 1.68                             | 3.20                    | 0.016                   | 108                       |                         |
| hsa-miR-34b-3p  | 0.71 | 0.56-0.86               | 34/18 | -12.33                  | -13.84                  | 2.02    | 2.22    | 1.51                             | 2.85                    | 0.016                   | 102                       |                         |
| hsa-miR-92a-3p  | 0.74 | 0.62-0.85               | 52/25 | -20.38                  | -20.76                  | 0.50    | 0.57    | 0.38                             | 1.30                    | 0.004                   | 90                        |                         |
| put-miR-476     | 0.68 | 0.55-0.81               | 52/24 | -16.19                  | -17.87                  | 3.03    | 2.39    | 1.68                             | 3.20                    | 0.020                   | 323                       |                         |
| put-miR-6       | 0.64 | 0.52-0.77               | 51/24 | -14.42                  | -16.13                  | 3.49    | 2.65    | 1.71                             | 3.27                    | 0.037                   | 85                        | 0.006                   |
| RNU6-4          | 0.73 | 0.67-0.88               | 52/25 | -19.90                  | -21.80                  | 2.19    | 1.65    | 1.9                              | 3.73                    | 0.000                   | 62                        |                         |
| RNU6-45         | 0.76 | 0.65-0.86               | 52/24 | -18.86                  | -20.85                  | 2.19    | 1.72    | 1.99                             | 3.97                    | 0.000                   | 59                        | 0.003                   |
| RNU6-6          | 0.76 | 0.66-0.87               | 53/25 | -19.78                  | -21.56                  | 2.01    | 1.63    | 1.78                             | 3.43                    | 0.000                   | 61                        | 0.006                   |
| RNU6-7          | 0.75 | 0.65-0.86               | 53/25 | -19.82                  | -21.54                  | 2.01    | 1.69    | 1.72                             | 3.29                    | 0.000                   | 66                        | 0.043                   |
| RNU6-73         | 0.75 | 0.64-0.86               | 53/25 | -19.76                  | -21.39                  | 1.87    | 1.74    | 1.63                             | 3.10                    | 0.000                   | 66                        | 0.050                   |
| SNORD3B-2       | 0.66 | 0.54-0.79               | 53/25 | -19.25                  | -20.07                  | 1.62    | 1.07    | 0.82                             | 1.77                    | 0.025                   | 186                       | 0.038                   |
| tRNA120-AlaAGC  | 0.64 | 0.52-0.77               | 51/24 | -16.29                  | -14.34                  | 3.65    | 2.67    | -1.95                            | 0.26                    | 0.023                   | 98                        |                         |
| tRNA18-ArgCCT   | 0.72 | 0.61-0.84               | 53/25 | -22.31                  | -23.74                  | 1.80    | 1.67    | 1.43                             | 2.69                    | 0.001                   | 73                        |                         |
| tRNA27-MetCAT   | 0.68 | 0.56-0.80               | 52/25 | -18.36                  | -16.86                  | 1.88    | 1.31    | -1.27                            | 0.41                    | 0.030                   | 176                       |                         |
| tRNA73-ArgCCG   | 0.68 | 0.56-0.80               | 52/25 | -16.65                  | -18.12                  | 2.31    | 1.72    | 1.47                             | 2.77                    | 0.006                   | 66                        |                         |
| U2.3            | 0.64 | 0.51-0.76               | 53/25 | -26.58                  | -27.64                  | 2.13    | 0.96    | 1.06                             | 2.08                    | 0.003                   | 162                       |                         |

|                    |            |                                        |              |                                               |                                              |                    |                   |                                                        |                                  |                                        |                                          |                                        |
|--------------------|------------|----------------------------------------|--------------|-----------------------------------------------|----------------------------------------------|--------------------|-------------------|--------------------------------------------------------|----------------------------------|----------------------------------------|------------------------------------------|----------------------------------------|
| U6.375             | 0.71       | 0.59-0.83                              | 53/25        | -16.38                                        | -17.70                                       | 1.77               | 1.58              | 1.32                                                   | 2.50                             | 0.002                                  | 92                                       | 0.005                                  |
| U6.601             | 0.72       | 0.61-0.84                              | 53/25        | -18.17                                        | -19.73                                       | 1.96               | 1.75              | 1.56                                                   | 2.95                             | 0.001                                  | 77                                       |                                        |
| Y RNA.255          | 0.70       | 0.58-0.81                              | 53/25        | -23.71                                        | -24.94                                       | 1.77               | 1.40              | 1.23                                                   | 2.35                             | 0.003                                  | 93                                       | 0.038                                  |
| <b>HIA+ vs MSK</b> | <b>AUC</b> | <b>95%<br/>Confidence<br/>Interval</b> | <b>Count</b> | <b>Average <math>\Delta</math>cq<br/>HIA+</b> | <b>Average<br/><math>\Delta</math>cq MSK</b> | <b>SD<br/>HIA+</b> | <b>SD<br/>MSK</b> | <b><math>\Delta\Delta</math>cq<br/>(HIA+)-<br/>MSK</b> | <b>Fold change<br/>HIA+/ MSK</b> | <b>t-test<br/>p-value<br/>Season 1</b> | <b>Power<br/>analysis<br/>(p = 0.05)</b> | <b>t-test<br/>p-value<br/>Season 2</b> |
| tRNA18ArgCCT       | 0.73       | 0.62-0.83                              | 53/31        | -22.31                                        | -23.57                                       | 1.80               | 1.45              | 1.26                                                   | 2.39                             | 0.001                                  | 123                                      |                                        |
| RNU6-7             | 0.69       | 0.57-0.81                              | 53/31        | -19.82                                        | -21.11                                       | 2.01               | 1.77              | 1.29                                                   | 2.45                             | 0.004                                  | 322                                      | 0.007                                  |
| U6.168             | 0.69       | 0.57-0.81                              | 52/30        | -16.74                                        | -17.78                                       | 1.67               | 1.62              | 1.04                                                   | 2.06                             | 0.008                                  | 335                                      | 0.007                                  |
| hsa-miR-143-3p     | 0.68       | 0.56-0.81                              | 53/31        | -18.17                                        | -17.64                                       | 0.92               | 1.03              | -0.53                                                  | 0.69                             | 0.017                                  | 128                                      | 0.031                                  |
| RNU6-45            | 0.69       | 0.57-0.81                              | 53/31        | -18.86                                        | -20.32                                       | 2.19               | 2.21              | 1.46                                                   | 2.75                             | 0.004                                  | 290                                      | 0.001                                  |
| RNU6-4             | 0.69       | 0.57-0.86                              | 53/31        | -19.90                                        | -21.20                                       | 2.19               | 2.09              | 1.3                                                    | 2.46                             | 0.009                                  | 396                                      |                                        |
| RNU6-73            | 0.69       | 0.57-0.82                              | 53/31        | -19.76                                        | -20.93                                       | 1.87               | 2.01              | 1.17                                                   | 2.25                             | 0.009                                  | 458                                      | 0.002                                  |
| U6.375             | 0.67       | 0.55-0.79                              | 53/30        | -16.38                                        | -17.39                                       | 1.77               | 1.50              | 1.01                                                   | 2.01                             | 0.010                                  | 433                                      | 0.002                                  |
| hsa-miR-16-1-3p    | 0.68       | 0.56-0.79                              | 53/31        | -14.16                                        | -14.94                                       | 1.41               | 1.36              | 0.78                                                   | 1.72                             | 0.016                                  | 166                                      | 0.000                                  |
| YRNA-255           | 0.67       | 0.55-0.79                              | 53/31        | -23.71                                        | -24.77                                       | 1.77               | 1.67              | 1.06                                                   | 2.08                             | 0.008                                  | 260                                      | 0.008                                  |
| RNU6-6             | 0.69       | 0.57-0.81                              | 53/31        | -19.79                                        | -20.98                                       | 2.01               | 2.10              | 1.19                                                   | 2.28                             | 0.011                                  | 499                                      | 0.001                                  |
| UC022CJG1          | 0.66       | 0.54-0.78                              | 53/31        | -22.05                                        | -22.65                                       | 1.05               | 0.99              | 0.6                                                    | 1.52                             | 0.011                                  | 127                                      |                                        |
| SNORA57            | 0.63       | 0.50-0.76                              | 53/31        | -22.82                                        | -21.34                                       | 1.15               | 1.13              | -1.48                                                  | 0.36                             | 0.050                                  | 516                                      | 0.015                                  |
| U6.601             | 0.69       | 0.56-0.81                              | 53/31        | -18.17                                        | -19.21                                       | 1.96               | 2.07              | 1.04                                                   | 2.06                             | 0.024                                  | 231                                      | 0.005                                  |

**eTable 5: Univariate analysis of comparisons at time point T3**

AUC, CI, count,  $\Delta$ Cq average, SD,  $\Delta\Delta$ cq, fold change, t-test p value and power analysis for each comparison of individual biomarkers between HIA+ and Uninjured, HIA- and MSK groups in season 1. T-test p values of season 2 are also reported when found  $\leq 0.05$ .

| HIA+ vs Uninjured (U) | AUC  | 95%<br>Confidence<br>interval | Count | Average<br>$\Delta$ cq<br>HIA+ | Average<br>$\Delta$ cq<br>U | SD<br>HIA+ | SD<br>U | $\Delta\Delta$ cq<br>(HIA+)-<br>U | Fold change<br>HIA+/ U | t-test<br>p-value<br>Season 1 | Power<br>analysis<br>(p =<br>0.05) | t-test<br>p-value<br>Season<br>2 |
|-----------------------|------|-------------------------------|-------|--------------------------------|-----------------------------|------------|---------|-----------------------------------|------------------------|-------------------------------|------------------------------------|----------------------------------|
| hsa-miR-144-3p        | 0.72 | 0.62-0.80                     | 44/39 | -12.54                         | -13.94                      | 1.94       | 2.50    | 1.4                               | 2.64                   | 0.005                         | 133                                |                                  |
| hsa-let-7f-5p         | 0.63 | 0.52-0.72                     | 55/46 | -16.33                         | -16.95                      | 1.44       | 1.41    | 0.62                              | 1.54                   | 0.033                         | 279                                | 0.007                            |
| U6.1249               | 0.65 | 0.56-0.74                     | 41/32 | -10.16                         | -8.89                       | 3.17       | 2.30    | -1.27                             | 0.41                   | 0.051                         | 221                                |                                  |



| HIA+ vs HIA-    | AUC  | 95% Confidence interval | Count | Average $\Delta$ cq HIA+ | Average $\Delta$ cq HIA- | SD HIA+ | SD HIA- | $\Delta$ cq (HIA+) - (HIA-) | Fold change HIA+ / HIA- | t-test p-value Season 1 | Power analysis (p = 0.05) | t-test p-value Season 2 |
|-----------------|------|-------------------------|-------|--------------------------|--------------------------|---------|---------|-----------------------------|-------------------------|-------------------------|---------------------------|-------------------------|
| hsa-let-7a-5p   | 0.69 | 0.52-0.82               | 55/20 | -20.33                   | -20.62                   | 0.56    | 0.43    | 0.29                        | 1.22                    | 0.042                   | 154                       |                         |
| hsa-let-7f-5p   | 0.89 | 0.82-0.96               | 55/20 | -16.33                   | -18.16                   | 1.44    | 0.65    | 1.83                        | 3.56                    | 0.000                   | 28                        | 0.007                   |
| hsa-miR-103a-3p | 0.74 | 0.61-0.86               | 54/20 | -19.71                   | -20.38                   | 0.84    | 0.65    | 0.67                        | 1.59                    | 0.002                   | 75                        | 0.001                   |
| hsa-miR-107     | 0.73 | 0.60-0.86               | 55/20 | -19.31                   | -19.85                   | 0.59    | 0.81    | 0.54                        | 1.45                    | 0.008                   | 107                       | 0.037                   |
| hsa-miR-144-3p  | 0.69 | 0.55-0.83               | 44/20 | -12.54                   | -14.01                   | 1.94    | 2.44    | 1.47                        | 2.77                    | 0.012                   | 161                       | 0.000                   |
| hsa-miR-148a-3p | 0.66 | 0.51-0.80               | 55/20 | -19.09                   | -19.62                   | 1.11    | 0.55    | 0.53                        | 1.44                    | 0.007                   | 212                       |                         |
| hsa-miR-21-5p   | 0.71 | 0.56-0.85               | 55/20 | -21.88                   | -22.55                   | 0.92    | 0.87    | 0.67                        | 1.59                    | 0.006                   | 89                        | 0.005                   |
| hsa-miR-34b-3p  | 0.70 | 0.54-0.86               | 41/12 | -12.34                   | -13.99                   | 2.30    | 2.16    | 1.65                        | 3.14                    | 0.032                   | 98                        | 0.000                   |
| put-miR-465     | 0.77 | 0.64-0.89               | 39/18 | -13.15                   | -10.84                   | 2.59    | 2.13    | -2.31                       | 0.20                    | 0.002                   | 1666                      |                         |
| RNU6-4          | 0.70 | 0.57-0.83               | 55/20 | -20.26                   | -21.46                   | 1.88    | 1.42    | 1.2                         | 2.30                    | 0.012                   | 121                       |                         |
| RNU6-45         | 0.69 | 0.56-0.82               | 55/20 | -19.22                   | -20.51                   | 2.05    | 1.45    | 1.29                        | 2.45                    | 0.011                   | 123                       |                         |
| RNU6-6          | 0.69 | 0.56-0.82               | 55/20 | -20.09                   | -21.24                   | 1.81    | 1.43    | 1.15                        | 2.22                    | 0.012                   | 123                       | 0.012                   |
| RNU6-7          | 0.68 | 0.54-0.81               | 55/20 | -20.13                   | -21.17                   | 1.79    | 1.47    | 1.04                        | 2.06                    | 0.023                   | 153                       | 0.033                   |
| RNU6-73         | 0.67 | 0.54-0.81               | 55/20 | -20.02                   | -21.08                   | 1.80    | 1.47    | 1.06                        | 2.08                    | 0.021                   | 149                       |                         |
| tRNA2-LeuTAA    | 0.60 | 0.47-0.73               | 55/20 | -17.03                   | -17.63                   | 1.56    | 0.91    | 0.6                         | 1.52                    | 0.049                   | 248                       |                         |
| U2.3            | 0.64 | 0.50-0.77               | 55/20 | -26.57                   | -27.52                   | 1.96    | 1.06    | 0.95                        | 1.93                    | 0.042                   | 180                       |                         |
| U6.601          | 0.66 | 0.53-0.79               | 54/20 | -18.42                   | -19.46                   | 1.89    | 1.60    | 1.04                        | 2.06                    | 0.034                   | 177                       |                         |
| snoU13.120      | 0.60 | 0.52-0.82               | 32/16 | -12.59                   | -12.95                   | 2.46    | 2.11    | 0.36                        | 1.28                    | 0.05                    | 228                       | 0.018                   |
| HIA+ vs MSK     | AUC  | 95% Confidence Interval | Count | Average $\Delta$ cq HIA+ | Average $\Delta$ cq MSK  | SD HIA+ | SD MSK  | $\Delta$ cq (HIA+) - MSK    | Fold change HIA+ / MSK  | t-test p-value Season 1 | Power analysis (p = 0.05) | t-test p-value Season 2 |
| hsa-let-7f-5p   | 0.71 |                         | 55/25 | -20.33                   | -20.28                   | 0.56    | 1.06    | -0.05                       | 0.97                    | 0.011                   | 107                       |                         |

|                 |      |           |       |        |        |      |      |       |      |       |      |       |
|-----------------|------|-----------|-------|--------|--------|------|------|-------|------|-------|------|-------|
|                 |      | 0.59-0.83 |       |        |        |      |      |       |      |       |      |       |
| hsa-miR-135b-5p | 0.73 | 0.61-0.86 | 52/25 | -14.95 | -14.08 | 0.96 | 1.30 | -0.87 | 0.55 | 0.001 | 72   | 0.019 |
| hsa-miR-425-5p  | 0.71 | 0.53-0.85 | 55/25 | -18.47 | -19.20 | 0.87 | 1.09 | 0.73  | 1.66 | 0.002 | 134  |       |
| hsa-miR-16-1-3p | 0.74 | 0.63-0.86 | 54/25 | -13.80 | -15.06 | 1.59 | 1.33 | 1.26  | 2.39 | 0.001 | 75   | 0.000 |
| U6.428          | 0.71 | 0.58-0.83 | 46/21 | -13.09 | -14.26 | 1.53 | 1.59 | 1.17  | 2.25 | 0.006 | 147  | 0.012 |
| hsa-miR-144-3p  | 0.80 | 0.69-0.91 | 44/15 | -12.54 | -14.57 | 1.94 | 2.49 | 2.03  | 4.08 | 0.002 | 75   | 0.016 |
| YRNA-255        | 0.70 | 0.58-0.82 | 55/25 | -23.91 | -25.06 | 1.71 | 1.47 | 1.15  | 2.22 | 0.006 | 292  | 0.008 |
| SNORA57         | 0.68 | 0.55-0.81 | 55/25 | -20.64 | -21.42 | 1.20 | 1.05 | 0.78  | 1.72 | 0.006 | 159  | 0.015 |
| hsa-miR-21-5p   | 0.67 | 0.53-0.80 | 55/25 | -21.84 | -21.40 | 0.92 | 1.03 | -0.44 | 0.74 | 0.039 | 151  |       |
| put-miR-893     | 0.66 | 0.53-0.79 | 55/25 | -27.77 | -29.07 | 2.69 | 2.28 | 1.3   | 2.46 | 0.039 | 181  |       |
| tRNA27-MetCAT   | 0.65 | 0.53-0.78 | 55/25 | -18.53 | -19.42 | 1.76 | 1.53 | 0.89  | 1.85 | 0.032 | 346  | 0.016 |
| tRNA18ArgCCT    | 0.64 | 0.52-0.77 | 55/25 | -22.59 | -23.74 | 2.16 | 1.60 | 1.15  | 2.22 | 0.020 | 358  |       |
| tRNA8-ThrAGT    | 0.64 | 0.51-0.76 | 55/25 | -18.08 | -19.24 | 2.82 | 2.10 | 1.16  | 2.23 | 0.045 | 2778 |       |
| RNU4-6P         | 0.61 | 0.47-0.74 | 55/25 | -16.98 | -16.23 | 1.49 | 1.09 | -0.75 | 0.59 | 0.027 | 173  |       |
| U6.168          | 0.64 | 0.49-0.78 | 55/25 | -16.78 | -17.60 | 1.57 | 1.92 | 0.82  | 1.77 | 0.046 | 619  | 0.007 |

**eTable 6: Pairwise comparison of HIA+ and baseline values**

Count,  $\Delta Cq$  average, SD,  $\Delta \Delta Cq$ , fold change and paired-sample test for HIA+ values recorded in season 1 at each time point and pre-season baseline.

| HIA+ (T1) vs Baseline | Count | Average $\Delta Cq$ HIA+ (T1) | Average $\Delta Cq$ B | SD HIA+ (T1) | SD B | $\Delta \Delta Cq$ HIA+ (a) - B | Fold change HIA+ (a) / B | Pair sample test Sig. (2-tailed) |
|-----------------------|-------|-------------------------------|-----------------------|--------------|------|---------------------------------|--------------------------|----------------------------------|
| hsa-let-7f-5p         | 219   | -18.01                        | -17.67                | 0.74         | 1.27 | -0.35                           | -1.27                    | 0.02                             |
| hsa-miR-1246          | 219   | -21.66                        | -20.79                | 0.75         | 1.04 | -0.87                           | -1.83                    | 0.00                             |

|                       |              |                                      |                          |                             |             |                               |                                          |                                                 |
|-----------------------|--------------|--------------------------------------|--------------------------|-----------------------------|-------------|-------------------------------|------------------------------------------|-------------------------------------------------|
| put-miR-1207          | 207          | -15.59                               | -12.28                   | 3.27                        | 2.22        | -3.30                         | -9.88                                    | 0.00                                            |
| RNU4-6p               | 219          | -17.44                               | -16.85                   | 1.12                        | 1.09        | -0.59                         | -1.51                                    | 0.00                                            |
| put-miR-468           | 64           | -14.10                               | -12.25                   | 1.33                        | 1.70        | -1.85                         | -3.60                                    | 0.05                                            |
| has-miR-148a-3p       | 219          | -19.97                               | -19.67                   | 0.88                        | 0.66        | -0.29                         | -1.22                                    | 0.01                                            |
| hsa-miR-143-3p        | 114          | -18.00                               | -18.17                   | 0.99                        | 0.92        | 0.16                          | 1.12                                     | 0.00                                            |
| hsa-miR-34b-3p        | 182          | -13.93                               | -12.33                   | 1.51                        | 1.87        | -1.60                         | -3.04                                    | 0.00                                            |
| U2.3                  | 219          | -27.18                               | -27.13                   | 1.32                        | 1.31        | -0.05                         | -1.03                                    | 0.01                                            |
| U4.64                 | 107          | -11.33                               | -11.90                   | 2.36                        | 2.64        | 0.57                          | 1.49                                     | 0.00                                            |
| tRNA27-MetCAT         | 112          | -18.60                               | -18.36                   | 1.48                        | 1.88        | -0.24                         | -1.18                                    | 0.01                                            |
| hsa-let-7b-5p         | 219          | -20.07                               | -20.26                   | 0.58                        | 0.58        | 0.19                          | 1.14                                     | 0.00                                            |
| hsa-miR-142-3p        | 114          | -23.48                               | -23.56                   | 0.77                        | 0.87        | 0.08                          | 1.06                                     | 0.00                                            |
| hsa-miR-142-5p        | 219          | -20.83                               | -20.14                   | 0.90                        | 1.03        | -0.69                         | -1.61                                    | 0.00                                            |
| hsa-miR-29c-3p        | 219          | -19.93                               | -19.74                   | 0.58                        | 0.58        | -0.19                         | -1.14                                    | 0.00                                            |
| put-miR-1146          | 122          | -12.59                               | -11.17                   | 2.39                        | 2.97        | -1.43                         | -2.69                                    | 0.00                                            |
| tRNA2-LeuTAA          | 219          | -16.87                               | -17.65                   | 1.30                        | 1.47        | 0.78                          | 1.71                                     | 0.01                                            |
| tRNA9-TyrGTA          | 206          | -13.04                               | -11.65                   | 2.42                        | 2.07        | -1.39                         | -2.61                                    | 0.00                                            |
| YRNA-245              | 219          | -15.50                               | -14.70                   | 1.42                        | 1.36        | -0.80                         | -1.74                                    | 0.01                                            |
| <b>HIA+ (T2) vs B</b> | <b>Count</b> | <b>Average<br/>Δcq<br/>HIA+ (T2)</b> | <b>Average<br/>Δcq B</b> | <b>SD<br/>HIA+<br/>(T2)</b> | <b>SD B</b> | <b>ΔΔcq<br/>HIA+ (T2) - B</b> | <b>Fold change<br/>HIA+ (T2) /<br/>B</b> | <b>Pair sample<br/>test<br/>Sig. (2-tailed)</b> |
| hsa-let-7f-5p         | 229          | -16.24                               | -17.67                   | 1.30                        | 1.27        | 1.43                          | 2.69                                     | 0.01                                            |
| hsa-miR-1246          | 229          | -21.39                               | -20.79                   | 1.33                        | 1.04        | -0.60                         | -1.52                                    | 0.01                                            |
| hsa-miR-135b-5p       | 226          | -14.17                               | -15.45                   | 0.90                        | 0.96        | 1.28                          | 2.43                                     | 0.00                                            |
| hsa-miR-21-5p         | 229          | -21.86                               | -22.45                   | 0.99                        | 0.74        | 0.59                          | 1.51                                     | 0.03                                            |
| hsa-miR-425-5p        | 229          | -18.87                               | -18.37                   | 0.71                        | 0.86        | -0.50                         | -1.41                                    | 0.00                                            |
| put-miR-1207          | 217          | -13.48                               | -12.28                   | 3.36                        | 2.22        | -1.20                         | -2.30                                    | 0.04                                            |
| hsa-let-7a-5p         | 229          | -20.09                               | -20.65                   | 0.49                        | 0.41        | 0.56                          | 1.47                                     | 0.00                                            |
| hsa-miR-143-3p        | 229          | -18.17                               | -17.60                   | 0.92                        | 1.18        | -0.57                         | -1.48                                    | 0.00                                            |
| hsa-miR-34b-3p        | 180          | -12.33                               | -12.33                   | 2.02                        | 1.87        | 0.00                          | -1.00                                    | 0.03                                            |
| SNORD3B               | 229          | -19.25                               | -20.20                   | 1.62                        | 1.03        | 0.94                          | 1.92                                     | 0.02                                            |
| U6.168                | 228          | -16.74                               | -16.82                   | 1.67                        | 1.56        | 0.07                          | 1.05                                     | 0.03                                            |
| YRNA-684              | 196          | -12.30                               | -10.58                   | 2.68                        | 2.12        | -1.72                         | -3.29                                    | 0.00                                            |
| hsa-miR-144-3p        | 208          | -14.19                               | -13.70                   | 2.60                        | 2.06        | -0.49                         | -1.41                                    | 0.01                                            |
| hsa-miR-16-1-3p       | 226          | -14.16                               | -13.71                   | 1.41                        | 1.49        | -0.45                         | -1.36                                    | 0.03                                            |
| put-miR-893           | 229          | -28.04                               | -27.27                   | 2.65                        | 1.94        | -0.77                         | -1.71                                    | 0.04                                            |
| U4.64                 | 221          | -11.90                               | -10.76                   | 2.64                        | 1.89        | -1.14                         | -2.20                                    | 0.00                                            |
| SNORA57               | 229          | -20.82                               | -20.63                   | 1.15                        | 1.06        | -0.20                         | -1.15                                    | 0.04                                            |
| UC022CJG1             | 229          | -22.04                               | -22.64                   | 1.05                        | 0.94        | 0.60                          | 1.51                                     | 0.02                                            |
| hsa-let-7b-5p         | 229          | -20.21                               | -20.26                   | 0.90                        | 0.58        | 0.05                          | 1.04                                     | 0.01                                            |
| hsa-miR-142-3p        | 229          | -23.56                               | -22.94                   | 0.87                        | 1.11        | -0.63                         | -1.55                                    | 0.00                                            |
| hsa-miR-142-5p        | 229          | -20.82                               | -20.14                   | 0.97                        | 1.03        | -0.68                         | -1.61                                    | 0.00                                            |
| hsa-miR-29c-3p        | 229          | -19.79                               | -19.74                   | 0.90                        | 0.58        | -0.05                         | -1.04                                    | 0.01                                            |

| HIA+ (T3) vs B  | Count | Average $\Delta$ cq HIA+ (T3) | Average $\Delta$ cq B | SD HIA+ (T3) | SD B | $\Delta\Delta$ cq HIA+ (T3) - B | Fold change HIA+ (T3) / B | Pair sample test Sig. (2-tailed) |
|-----------------|-------|-------------------------------|-----------------------|--------------|------|---------------------------------|---------------------------|----------------------------------|
| tRNA2-LeuTAA    | 227   | -16.87                        | -17.65                | 1.99         | 1.47 | 0.78                            | 1.72                      | 0.02                             |
| tRNA9-TyrGTA    | 213   | -13.06                        | -11.65                | 2.84         | 2.07 | -1.41                           | -2.65                     | 0.00                             |
| YRNA-245        | 229   | -15.18                        | -14.70                | 1.83         | 1.36 | -0.48                           | -1.40                     | 0.00                             |
| hsa-miR-339-5p  | 229   | -15.89                        | -15.50                | 1.60         | 1.30 | -0.39                           | -1.31                     | 0.02                             |
| hsa-let-7f-5p   | 231   | -16.33                        | -17.67                | 1.44         | 1.27 | 1.34                            | 2.52                      | 0.02                             |
| hsa-miR-1246    | 231   | -21.19                        | -20.79                | 1.21         | 1.04 | -0.40                           | -1.32                     | 0.01                             |
| hsa-miR-135b-5p | 228   | -14.95                        | -15.45                | 0.96         | 0.96 | 0.50                            | 1.41                      | 0.00                             |
| hsa-miR-21-5p   | 231   | -21.88                        | -22.45                | 0.92         | 0.74 | 0.57                            | 1.48                      | 0.01                             |
| U6.428          | 215   | -13.10                        | -12.76                | 1.53         | 1.69 | -0.34                           | -1.26                     | 0.02                             |
| U6.168          | 231   | -16.78                        | -16.82                | 1.57         | 1.56 | 0.04                            | 1.03                      | 0.04                             |
| YRNA-684        | 201   | -11.24                        | -10.58                | 3.03         | 2.12 | -0.66                           | -1.58                     | 0.02                             |
| hsa-miR-92a-3p  | 231   | -20.47                        | -20.50                | 0.68         | 0.46 | 0.03                            | 1.02                      | 0.04                             |
| U4.64           | 231   | -16.98                        | -16.85                | 1.49         | 1.09 | -0.13                           | -1.09                     | 0.02                             |
| U6.1249         | 160   | -10.16                        | -8.96                 | 3.17         | 2.18 | -1.20                           | -2.30                     | 0.02                             |
| RNU4-6P         | 231   | -16.98                        | -16.85                | 1.49         | 1.08 | -0.13                           | -1.09                     | 0.03                             |

**eTable 7: Multivariable logistic regression analysis of concussion biomarkers across season-1 (training dataset) and season-2 (test dataset)**

AUCs (95% CI) of biomarker panel in seasons 1 (training dataset) and season 2 (test dataset) across different comparisons and time points. Fourteen biomarkers were included in this model. Under all control groups, HIA-, uninjured and MSK controls are included. P values are shown underneath each comparison.

| HIA+ (CONCUSSED) vs.      |                            |                            |                            |                            |                            |
|---------------------------|----------------------------|----------------------------|----------------------------|----------------------------|----------------------------|
|                           | All control groups         | HIA-                       | Uninjured                  | MSK controls               | Baselines                  |
| <i>SEASON 1 (2017-18)</i> |                            |                            |                            |                            |                            |
| Time point T1             | -                          | <b>1</b><br>(1-1)          | -                          | -                          | <b>1</b><br>(1-1)          |
| <i>p value</i>            |                            | 0.000                      |                            |                            | 0.000                      |
| Time point T2             | <b>0.91</b><br>(0.81-1.00) | <b>0.88</b><br>(0.74-1.00) | <b>0.93</b><br>(0.84-1.00) | <b>0.90</b><br>(0.78-1.00) | <b>0.95</b><br>(0.89-1.00) |
| <i>p value</i>            | 0.000                      | 0.006                      | 0.000                      | 0.000                      | 0.000                      |
| Time point T3             | <b>0.94</b><br>(0.86-1.00) | <b>0.96</b><br>(0.89-1.00) | <b>0.96</b><br>(0.88-1.00) | <b>0.90</b><br>(0.69-1.00) | <b>0.91</b><br>(0.84-0.98) |
| <i>p value</i>            | 0.000                      | 0.000                      | 0.000                      | 0.005                      | 0.000                      |

| <i>SEASON 2 (2018-19)</i> |                            |                             |                            |                            |   |
|---------------------------|----------------------------|-----------------------------|----------------------------|----------------------------|---|
| Time point T2             | <b>0.96</b><br>(0.92-1.00) | <b>0.94</b><br>(0.85-1.00)  | <b>0.94</b><br>(0.87-1.00) | <b>1.00</b><br>(1.00-1.00) | - |
| <i>p value</i>            | 0.000                      | 0.000                       | 0.000                      | 0.000                      |   |
| Time point T3             | <b>0.93</b><br>(0.86-1.00) | <b>0.86</b><br>( 0.73-1.00) | <b>0.95</b><br>(0.89-1.00) | <b>0.95</b><br>(0.88-1.00) | - |
| <i>p value</i>            | 0.000                      | 0.000                       | 0.000                      | 0.000                      |   |

**eTable 8: Summary statistics of the 14 biomarkers**

| has-let-7a-5p | Mean   | SD   | Min    | Median | Max    | IQR  | CV    |
|---------------|--------|------|--------|--------|--------|------|-------|
| Baseline      | -20.56 | 0.41 | -22.09 | -20.66 | -19.59 | 0.48 | -0.02 |
| HIA+ T1       | -20.46 | 0.51 | -21.69 | -20.38 | -19.15 | 0.56 | -0.02 |
| HIA+ T2       | -20.09 | 0.49 | -20.95 | -20.06 | -28.86 | 0.57 | -0.02 |
| HIA+ T3       | -20.33 | 0.56 | -22.33 | -20.32 | -19.08 | 0.65 | -0.03 |
| HIA- T1       | -20.61 | 0.44 | -21.55 | -20.55 | -19.89 | 0.57 | -0.02 |
| HIA- T2       | -20.55 | 0.41 | -21.56 | -20.51 | -19.55 | 0.44 | -0.02 |
| HIA- T3       | -20.62 | 0.43 | -21.51 | -20.65 | -19.53 | 0.37 | -0.02 |
| Uninjured T2  | -20.36 | 0.37 | -21.18 | -20.35 | -19.65 | 0.47 | -0.02 |
| Uninjured T3  | -20.49 | 0.61 | -21.63 | -20.52 | -18.14 | 0.75 | -0.03 |
| MSK T2        | -20.26 | 0.72 | -21.23 | -20.52 | -18.29 | 0.65 | -0.04 |
| MSK T3        | -20.38 | 0.62 | -21.22 | -20.22 | -18.74 | 0.85 | -0.03 |

| has-miR-103a-3p | Mean   | SD   | Min    | Median | Max    | IQR  | CV    |
|-----------------|--------|------|--------|--------|--------|------|-------|
| Baseline        | -20.16 | 0.61 | -22    | -20.19 | -17.47 | 0.69 | -0.03 |
| HIA+ T1         | -20.11 | 0.58 | -21.02 | -20.18 | -18.12 | 0.62 | -0.03 |
| HIA+ T2         | -19.7  | 0.88 | -21.14 | -19.81 | -16.92 | 0.79 | -0.04 |
| HIA+ T3         | -19.71 | 0.84 | -20.76 | -19.92 | -16.4  | 0.85 | -0.04 |
| HIA- T1         | -20.45 | 0.65 | -22.27 | -20.38 | -18.87 | 0.62 | -0.03 |
| HIA- T2         | -20.33 | 0.63 | -22.01 | -20.28 | -18.73 | 0.66 | -0.03 |
| HIA- T3         | -20.38 | 0.65 | -22.21 | -20.31 | -18.98 | 0.39 | -0.03 |

|                     |        |      |        |        |        |      |        |
|---------------------|--------|------|--------|--------|--------|------|--------|
| <b>Uninjured T2</b> | -20.08 | 0.77 | -21.88 | -20.17 | -17.85 | 0.91 | -0.04  |
| <b>Uninjured T3</b> | -19.87 | 0.88 | -21.15 | -19.99 | -17.27 | 0.71 | -0.04  |
|                     |        |      |        |        |        |      |        |
| <b>MSK T2</b>       | -19.82 | 0.79 | -21.45 | -19.83 | -17.52 | 0.78 | -0.04  |
| <b>MSK T3</b>       | -19.61 | 0.68 | -21.09 | -19.68 | -18    | 0.89 | -0.031 |

| <b>has-miR-143-3p</b> | <b>Mean</b> | <b>SD</b> | <b>Min</b> | <b>Median</b> | <b>Max</b> | <b>IQR</b> | <b>CV</b> |
|-----------------------|-------------|-----------|------------|---------------|------------|------------|-----------|
| <b>Baseline</b>       | -17.6       | 1.81      | -20.95     | -17.77        | -13.9      | 1.62       | -0.07     |
|                       |             |           |            |               |            |            |           |
| <b>HIA+ T1</b>        | -18.03      | 0.85      | -19.43     | -18.1         | -15.7      | 1.25       | -0.05     |
| <b>HIA+ T2</b>        | -18.17      | 0.92      | -19.58     | -18.36        | -15.74     | 1.27       | -0.05     |
| <b>HIA+ T3</b>        | -17.56      | 1.08      | -19.4      | -17.78        | -15.25     | 1.32       | -0.06     |
|                       |             |           |            |               |            |            |           |
| <b>HIA- T1</b>        | -18.14      | 0.79      | -19.78     | -18.23        | -16.36     | 1.19       | -0.04     |
| <b>HIA- T2</b>        | -17.93      | 0.82      | -19.52     | -17.91        | -16.67     | 1.23       | -0.05     |
| <b>HIA- T3</b>        | -17.91      | 1.02      | -19.7      | -17.99        | -15.74     | 1.28       | -0.06     |
|                       |             |           |            |               |            |            |           |
| <b>Uninjured T2</b>   | -18         | 0.99      | -19.91     | -18.01        | -16.03     | 1.29       | -0.05     |
| <b>Uninjured T3</b>   | -17.68      | 1.01      | -19.5      | -17.48        | -16.06     | 1.63       | -0.06     |
|                       |             |           |            |               |            |            |           |
| <b>MSK T2</b>         | -17.46      | 1.03      | -19.7      | -17.57        | -16.18     | 1.24       | -0.06     |
| <b>MSK T3</b>         | -17.01      | 1.25      | -19.59     | -17.32        | -14.59     | 1.75       | -0.07     |

| <b>has-miR-34b-3p</b> | <b>Mean</b> | <b>SD</b> | <b>Min</b> | <b>Median</b> | <b>Max</b> | <b>IQR</b> | <b>CV</b> |
|-----------------------|-------------|-----------|------------|---------------|------------|------------|-----------|
| <b>Baseline</b>       | -12.33      | 1.87      | -17.73     | -12.04        | -8.45      | 2.44       | -0.15     |
|                       |             |           |            |               |            |            |           |
| <b>HIA+ T1</b>        | -13.93      | 1.51      | -17.12     | -14.06        | -10.29     | 2.3        | -0.11     |
| <b>HIA+ T2</b>        | -12.33      | 2.02      | -16.98     | -12.18        | -8.71      | 2.47       | -0.16     |
| <b>HIA+ T3</b>        | -12.34      | 2.3       | -16.82     | -11.69        | -7.47      | 3.4        | -0.19     |
|                       |             |           |            |               |            |            |           |
| <b>HIA- T1</b>        | -14.96      | 2.22      | -20.24     | -14.85        | -10.44     | 2.37       | -0.15     |
| <b>HIA- T2</b>        | -13.84      | 2.22      | -18.91     | -13.63        | -9.58      | 1.76       | -0.16     |
| <b>HIA- T3</b>        | -13.99      | 2.16      | -17.67     | -13.71        | -10.4      | 1.89       | -0.15     |
|                       |             |           |            |               |            |            |           |
| <b>Uninjured T2</b>   | -13.97      | 2.48      | -19.2      | -13.85        | -9.21      | 3.41       | -0.18     |
| <b>Uninjured T3</b>   | -13.04      | 2.14      | -19.39     | -13.04        | -8.9       | 2.81       | -0.16     |
|                       |             |           |            |               |            |            |           |
| <b>MSK T2</b>         | -12.84      | 1.58      | -15.19     | -12.66        | -9.71      | 2.65       | -0.12     |
| <b>MSK T3</b>         | -12.25      | 2.03      | -15.92     | -12.14        | -8.63      | 2.1        | -0.17     |

| <b>RNU6.45</b> | <b>Mean</b> | <b>SD</b> | <b>Min</b> | <b>Median</b> | <b>Max</b> | <b>IQR</b> | <b>CV</b> |
|----------------|-------------|-----------|------------|---------------|------------|------------|-----------|
|                |             |           |            |               |            |            |           |

|                     |        |      |        |        |        |      |       |
|---------------------|--------|------|--------|--------|--------|------|-------|
|                     |        |      |        |        |        |      |       |
| <b>Baseline</b>     | -19.96 | 1.72 | -23.6  | -20.1  | -14.29 | 2.29 | -0.09 |
|                     |        |      |        |        |        |      |       |
| <b>HIA+ T1</b>      | -20.04 | 1.91 | -23.82 | -19.88 | -14.64 | 2.15 | -0.1  |
| <b>HIA+ T2</b>      | -18.86 | 2.19 | -24.09 | -18.92 | -11.97 | 2.82 | -0.12 |
| <b>HIA+ T3</b>      | -19.22 | 2.05 | -23.87 | -19.05 | -14.69 | 1.85 | -0.11 |
|                     |        |      |        |        |        |      |       |
| <b>HIA- T1</b>      | -20.18 | 1.74 | -23.27 | -19.94 | -16.78 | 2.55 | -0.09 |
| <b>HIA- T2</b>      | -20.81 | 1.73 | -23.7  | -20.06 | -18.29 | 2.33 | -0.08 |
| <b>HIA- T3</b>      | -20.51 | 1.45 | -22.87 | -20.72 | -18.38 | 2.33 | -0.07 |
|                     |        |      |        |        |        |      |       |
| <b>Uninjured T2</b> | -19.86 | 2.2  | -23.61 | -20    | -13.53 | 2.95 | -0.11 |
| <b>Uninjured T3</b> | -19.65 | 2.39 | -23.74 | -19.92 | -13    | 2.94 | -0.12 |
|                     |        |      |        |        |        |      |       |
| <b>MSK T2</b>       | -20.32 | 2.21 | -24.03 | -20.64 | -14.45 | 2.88 | -0.11 |
| <b>MSK T3</b>       | -20.14 | 2.45 | -23.49 | -20.32 | -12.75 | 2.86 | -0.12 |

| <b>RNU6.7</b>       | <b>Mean</b> | <b>SD</b> | <b>Min</b> | <b>Median</b> | <b>Max</b> | <b>IQR</b> | <b>CV</b> |
|---------------------|-------------|-----------|------------|---------------|------------|------------|-----------|
| <b>Baseline</b>     | -20.6       | 1.67      | -24.25     | -20.76        | -15.07     | 2.22       | -0.08     |
|                     |             |           |            |               |            |            |           |
| <b>HIA+ T1</b>      | -20.81      | 1.67      | -24.4      | -20.4         | -17.9      | 2.06       | -0.08     |
| <b>HIA+ T2</b>      | -19.82      | 2.01      | -24.56     | -19.83        | -13.14     | 2.2        | -0.1      |
| <b>HIA+ T3</b>      | -20.13      | 1.79      | -24.49     | -19.72        | -16.32     | 1.69       | -0.09     |
|                     |             |           |            |               |            |            |           |
| <b>HIA- T1</b>      | -20.9       | 1.59      | -23.89     | -20.46        | -17.33     | 2.22       | -0.08     |
| <b>HIA- T2</b>      | -21.54      | 1.69      | -24.42     | -20.77        | -19.18     | 2.72       | -0.08     |
| <b>HIA- T3</b>      | -21.17      | 1.47      | -23.75     | -21.4         | -18.89     | 2.34       | -0.07     |
|                     |             |           |            |               |            |            |           |
| <b>Uninjured T2</b> | -20.72      | 1.78      | -24.54     | -20.76        | -16.84     | 2.5        | -0.09     |
| <b>Uninjured T3</b> | -20.45      | 2.01      | -24.23     | -20.63        | -14.71     | 2.56       | -0.1      |
|                     |             |           |            |               |            |            |           |
| <b>MSK T2</b>       | -21.11      | 1.77      | -24.29     | -21.11        | -17.3      | 2.35       | -0.08     |
| <b>MSK T3</b>       | -20.96      | 2.11      | -23.94     | -21.27        | -16.21     | 3.14       | -0.1      |

| <b>snoU13.120</b> | <b>Mean</b> | <b>SD</b> | <b>Min</b> | <b>Median</b> | <b>Max</b> | <b>IQR</b> | <b>CV</b> |
|-------------------|-------------|-----------|------------|---------------|------------|------------|-----------|
| <b>Baseline</b>   | -12.48      | 2.46      | -25.84     | -11.96        | -8.22      | 2.87       | -0.2      |
|                   |             |           |            |               |            |            |           |
| <b>HIA+ T1</b>    | -13.81      | 3.06      | -19.83     | -14.5         | -8.4       | 5.06       | -0.22     |
| <b>HIA+ T2</b>    | -13.81      | 3.08      | -21.42     | -13.53        | -7.96      | 4.33       | -0.22     |
| <b>HIA+ T3</b>    | -12.59      | 2.47      | -18.12     | -12.05        | -8.49      | 3.76       | -0.2      |
|                   |             |           |            |               |            |            |           |
| <b>HIA- T1</b>    | -12.07      | 2.31      | -16.76     | -11.71        | -9.39      | 2.91       | -0.19     |
| <b>HIA- T2</b>    | -12.87      | 2.17      | -16.62     | -13.06        | -6.96      | 1.67       | -0.17     |

|                     |        |      |        |        |        |      |       |
|---------------------|--------|------|--------|--------|--------|------|-------|
| <b>HIA- T3</b>      | -12.95 | 2.11 | -19.62 | -12.63 | -10.29 | 1.98 | -0.16 |
| <b>Uninjured T2</b> | -12.91 | 2.68 | -18.88 | -12.71 | -4.96  | 3.04 | -0.21 |
| <b>Uninjured T3</b> | -13.13 | 2.57 | -18.48 | -12.52 | -9.09  | 3.93 | -0.2  |
| <b>MSK T2</b>       | -14.19 | 2.69 | -20.59 | -14.44 | -9.39  | 3.41 | -0.19 |
| <b>MSK T3</b>       | -13.18 | 2.32 | -17.03 | -13.57 | -9.29  | 3.5  | -0.18 |

| <b>tRNA18.ArgCCT</b> | <b>Mean</b> | <b>SD</b> | <b>Min</b> | <b>Median</b> | <b>Max</b> | <b>IQR</b> | <b>CV</b> |
|----------------------|-------------|-----------|------------|---------------|------------|------------|-----------|
| <b>Baseline</b>      | -22.9       | 1.62      | -26.92     | -23           | -18.51     | 2.11       | -0.07     |
| <b>HIA+ T1</b>       | -22.56      | 1.67      | -26.42     | -22.15        | -19.59     | 2.02       | -0.07     |
| <b>HIA+ T2</b>       | -22.31      | 1.8       | -27.33     | -22.1         | -19.26     | 2.31       | -0.08     |
| <b>HIA+ T3</b>       | -22.59      | 2.16      | -26.36     | -22.31        | -18.11     | 3.5        | -0.1      |
| <b>HIA- T1</b>       | -22.77      | 1.53      | -25.76     | -22.59        | -19.4      | 1.86       | -0.07     |
| <b>HIA- T2</b>       | -23.77      | 1.67      | -26.61     | -23.61        | -21.31     | 2.86       | -0.07     |
| <b>HIA- T3</b>       | -23.08      | 1.28      | -25.24     | -23.08        | -20.22     | 1.35       | -0.06     |
| <b>Uninjured T2</b>  | -22.8       | 1.66      | -26.3      | -22.84        | -18.87     | 2.31       | -0.07     |
| <b>Uninjured T3</b>  | -22.6       | 1.59      | -26.05     | -22.8         | -18.72     | 2.23       | -0.07     |
| <b>MSK T2</b>        | -23.57      | 1.45      | -26.6      | -23.45        | -21.27     | 1.62       | -0.06     |
| <b>MSK T3</b>        | -23.74      | 1.6       | -26.49     | -23.87        | -21.02     | 2.52       | -0.07     |

| <b>U6.1249</b>      | <b>Mean</b> | <b>SD</b> | <b>Min</b> | <b>Median</b> | <b>Max</b> | <b>IQR</b> | <b>CV</b> |
|---------------------|-------------|-----------|------------|---------------|------------|------------|-----------|
| <b>Baseline</b>     | -8.96       | 2.18      | -14.88     | -8.64         | -4.36      | 2.8        | -0.24     |
| <b>HIA+ T1</b>      | -9.89       | 2.48      | -16.57     | -9.42         | -4.99      | 2.99       | -0.25     |
| <b>HIA+ T2</b>      | -9.68       | 2.9       | -17.46     | -8.78         | -5.31      | 4.57       | -0.3      |
| <b>HIA+ T3</b>      | -10.16      | 3.17      | -17.81     | -9.81         | -5.57      | 5.42       | -0.31     |
| <b>HIA- T1</b>      | -10.27      | 2.56      | -15.78     | -10.14        | -5.48      | 2.61       | -0.25     |
| <b>HIA- T2</b>      | -9.83       | 1.67      | -12.61     | -9.77         | -7.11      | 2.2        | -0.17     |
| <b>HIA- T3</b>      | -9.99       | 2.73      | -17.29     | -9.09         | -6.39      | 1.72       | -0.27     |
| <b>Uninjured T2</b> | -9.92       | 2.65      | -15.08     | -9.75         | -5.32      | 3.51       | -0.27     |
| <b>Uninjured T3</b> | -8.89       | 2.3       | -16.74     | -8.7          | -4.66      | 2.36       | -0.26     |
| <b>MSK T2</b>       | -9.94       | 2.36      | -14.58     | -9.81         | -5.74      | 3.57       | -0.24     |
| <b>MSK T3</b>       | -10.51      | 1.89      | -13.23     | -10.36        | -7.27      | 2.38       | -0.18     |

| <b>U6.168</b> | <b>Mean</b> | <b>SD</b> | <b>Min</b> | <b>Median</b> | <b>Max</b> | <b>IQR</b> | <b>CV</b> |
|---------------|-------------|-----------|------------|---------------|------------|------------|-----------|
|---------------|-------------|-----------|------------|---------------|------------|------------|-----------|



|                     |        |      |        |        |        |      |       |
|---------------------|--------|------|--------|--------|--------|------|-------|
| <b>Baseline</b>     | -16.82 | 1.56 | -20.2  | -16.76 | -11.76 | 1.96 | -0.09 |
| <b>HIA+ T1</b>      | -17.07 | 1.38 | -20.17 | -16.69 | -15.07 | 1.94 | -0.08 |
| <b>HIA+ T2</b>      | -16.74 | 1.67 | -21.16 | -16.53 | -12.15 | 2.39 | -0.1  |
| <b>HIA+ T3</b>      | -16.78 | 1.57 | -20.3  | -16.41 | -14.48 | 2.47 | -0.09 |
| <b>HIA- T1</b>      | -17.01 | 1.46 | -19.91 | -17.03 | -13.77 | 2.24 | -0.09 |
| <b>HIA- T2</b>      | -17.46 | 1.49 | -20.04 | -17.06 | -15.32 | 2.06 | -0.09 |
| <b>HIA- T3</b>      | -17.37 | 1.43 | -19.74 | -17.02 | -15.37 | 2.12 | -0.08 |
| <b>Uninjured T2</b> | -17.16 | 1.55 | -20.01 | -17.13 | -13.29 | 2.08 | -0.09 |
| <b>Uninjured T3</b> | -17.04 | 1.64 | -20.15 | -16.98 | -13.97 | 2.41 | -0.1  |
| <b>MSK T2</b>       | -17.78 | 1.62 | -20.69 | -17.89 | 13.73  | 2.48 | -0.09 |
| <b>MSK T3</b>       | -17.6  | 1.92 | -20.67 | -17.64 | -13.8  | 2.96 | -0.11 |

| <b>U6.428</b>       | <b>Mean</b> | <b>SD</b> | <b>Min</b> | <b>Median</b> | <b>Max</b> | <b>IQR</b> | <b>CV</b> |
|---------------------|-------------|-----------|------------|---------------|------------|------------|-----------|
| <b>Baseline</b>     | -12.76      | 1.69      | -16.74     | -12.74        | -7.8       | 1.92       | -0.13     |
| <b>HIA+ T1</b>      | -12.69      | 1.51      | -16.27     | -12.45        | -10.55     | 2.02       | -0.12     |
| <b>HIA+ T2</b>      | -12.87      | 1.62      | -16.69     | -12.87        | -9.62      | 1.88       | -0.13     |
| <b>HIA+ T3</b>      | -13.1       | 1.53      | -16.65     | -12.82        | -9.7       | 1.86       | -0.12     |
| <b>HIA- T1</b>      | -12.9       | 1.49      | -15.61     | -12.8         | -10.43     | 2.4        | -0.12     |
| <b>HIA- T2</b>      | -13.27      | 1.8       | -16.31     | -13.14        | -10.05     | 2.71       | -0.14     |
| <b>HIA- T3</b>      | -13.05      | 1.49      | -16.29     | -12.72        | -10.84     | 2.29       | -0.11     |
| <b>Uninjured T2</b> | -13.33      | 1.56      | -16.43     | -13.42        | -9.05      | 1.73       | -0.12     |
| <b>Uninjured T3</b> | -13.27      | 1.39      | -15.72     | -13.09        | -10.78     | 2.31       | -0.11     |
| <b>MSK T2</b>       | -13.6       | 1.69      | -17.3      | -13.89        | -10.43     | 2.16       | -0.12     |
| <b>MSK T3</b>       | -14.26      | 1.59      | -17.55     | -13.93        | -11.46     | 2.41       | -0.11     |

| <b>uc022cjl</b> | <b>Mean</b> | <b>SD</b> | <b>Min</b> | <b>Median</b> | <b>Max</b> | <b>IQR</b> | <b>CV</b> |
|-----------------|-------------|-----------|------------|---------------|------------|------------|-----------|
| <b>Baseline</b> | -22.64      | 0.94      | -25.76     | -22.62        | -20.14     | 1.12       | -0.04     |
| <b>HIA+ T1</b>  | -22.36      | 0.89      | -24.48     | -19.54        | -20.72     | 0.94       | -0.04     |
| <b>HIA+ T2</b>  | -22.04      | 1.05      | -24.32     | -22.12        | -19.54     | 1.21       | -0.05     |
| <b>HIA+ T3</b>  | -22.57      | 1.16      | -25.04     | -22.69        | -19.63     | 1.43       | -0.05     |
| <b>HIA- T1</b>  | -22.18      | 0.82      | -23.64     | -22.15        | -20.47     | 1.03       | -0.04     |

|                     |        |      |        |        |        |      |       |
|---------------------|--------|------|--------|--------|--------|------|-------|
| <b>HIA- T2</b>      | -22.36 | 1.17 | -25.66 | -22.45 | -19.44 | 1    | -0.05 |
| <b>HIA- T3</b>      | -22.82 | 0.9  | -25.3  | -22.68 | -21.58 | 0.74 | -0.04 |
|                     |        |      |        |        |        |      |       |
| <b>Uninjured T2</b> | -22.28 | 1    | -24.09 | -22.38 | -19.96 | 1.35 | -0.04 |
| <b>Uninjured T3</b> | -22.32 | 1.03 | -24.59 | -22.22 | -19.25 | 1.03 | -0.05 |
|                     |        |      |        |        |        |      |       |
| <b>MSK T2</b>       | -22.65 | 0.99 | -25.68 | -22.77 | -21.01 | 1.05 | -0.04 |
| <b>MSK T3</b>       | -23.09 | 1.29 | -26.61 | -23.09 | -20.75 | 1.29 | -0.06 |

| <b>Y-RNA.255</b>    | <b>Mean</b> | <b>SD</b> | <b>Min</b> | <b>Median</b> | <b>Max</b> | <b>IQR</b> | <b>CV</b> |
|---------------------|-------------|-----------|------------|---------------|------------|------------|-----------|
| <b>Baseline</b>     | -24.11      | 1.65      | -27.32     | -24.21        | -19.59     | 2.42       | -0.07     |
|                     |             |           |            |               |            |            |           |
| <b>HIA+ T1</b>      | -24.28      | 1.6       | -27.77     | -23.99        | -20.99     | 1.96       | -0.07     |
| <b>HIA+ T2</b>      | -23.71      | 1.77      | -27.23     | -23.88        | -19.37     | 2.59       | -0.07     |
| <b>HIA+ T3</b>      | -23.91      | 1.76      | -27.77     | -23.53        | -20.53     | 2.81       | -0.07     |
|                     |             |           |            |               |            |            |           |
| <b>HIA- T1</b>      | -24.411     | 1.43      | -26.97     | -24.23        | -21.67     | 2.43       | -0.061    |
| <b>HIA- T2</b>      | -24.94      | 1.4       | -27.74     | -24.6         | -22.62     | 2.25       | -0.06     |
| <b>HIA- T3</b>      | -24.45      | 1.29      | -26.59     | -24.41        | -21.87     | 1.9        | -0.05     |
|                     |             |           |            |               |            |            |           |
| <b>Uninjured T2</b> | -24.44      | 1.65      | -28.621    | -24.65        | -20.7      | 2.47       | -0.071    |
| <b>Uninjured T3</b> | -23.99      | 1.97      | -27.59     | -24.25        | -17.77     | 2.54       | -0.08     |
|                     |             |           |            |               |            |            |           |
| <b>MSK T2</b>       | -24.77      | 1.67      | -27.38     | -24.86        | -19.95     | 2.1        | -0.07     |
| <b>MSK T3</b>       | -25.06      | 1.47      | -27.8      | -25.26        | -21.53     | 2.26       | -0.061    |

### Uncensored data

After independent review of the incidents, 47 cases were excluded due to incomplete HIA documentation or failure to identify a clear mechanism of injury on the video footage. The analysis of the complete dataset including the excluded incidents does not show substantial differences from the censored data. The full uncensored dataset analysis is reported in the eTable 9. The overlap with the previous analysis is evidenced in grey cells.

**eTable9: Analysis of uncensored data. Cells in grey match the biomarkers of eTable 3,4 and 5**

| <b>HIA+ (T2) vs Uninjured (T2)</b> | <b>t-test</b>  |
|------------------------------------|----------------|
|                                    | <b>p-value</b> |
| hsa-let-7a-5p                      | 0.002          |
| hsa-let-7f-5p                      | 0.000          |
| hsa-let-7i-5p                      | 0.021          |
| hsa-miR-103a-3p                    | 0.023          |
| hsa-miR-107                        | 0.049          |
| hsa-miR-135b-5p                    | 0.001          |
| hsa-miR-34b-3p                     | 0.001          |
| put-miR-742                        | 0.028          |
| RNU6-4                             | 0.007          |
| RNU6-45                            | 0.025          |
| RNU6-6                             | 0.018          |
| RNU6-7                             | 0.018          |
| RNU6-73                            | 0.018          |
| U6.375                             | 0.045          |
| U6.601                             | 0.040          |
| YRNA-255                           | 0.040          |

| <b>HIA+ (T3) vs Uninjured (T3)</b> | <b>t-test</b>  |
|------------------------------------|----------------|
|                                    | <b>p-value</b> |
| hsa-miR-144-3p                     | 0.016          |

| <b>HIA+ (T1) vs HIA- (T1)</b> | <b>t-test</b>  |
|-------------------------------|----------------|
|                               | <b>p-value</b> |
| hsa-miR-103a-5p               | 0.038          |
| hsa-miR-126-3p                | 0.049          |
| hsa-miR-34b-3p                | 0.016          |

| <b>HIA+ (T2) vs HIA- (T2)</b> | <b>t-test</b>  |
|-------------------------------|----------------|
|                               | <b>p-value</b> |
| hsa-let-7a-5p                 | 0.000          |
| hsa-let-7f-5p                 | 0.000          |
| hsa-let-7i-5p                 | 0.001          |

|                 |       |
|-----------------|-------|
| hsa-miR-103a-3p | 0.001 |
| hsa-miR-107     | 0.009 |
| hsa-miR-135b-5p | 0.000 |
| hsa-miR-144-3p  | 0.025 |
| hsa-miR-148a-3p | 0.042 |
| hsa-miR-34b-3p  | 0.007 |
| hsa-miR-92a-3p  | 0.001 |
| put-miR-6       | 0.006 |
| put-miR-742     | 0.044 |
| RNU6-4          | 0.000 |
| RNU6-45         | 0.000 |
| RNU6-6          | 0.000 |
| RNU6-7          | 0.000 |
| RNU6-73         | 0.000 |
| SNORAD3B-2      | 0.022 |
| tRNA120-AlaAGC  | 0.014 |
| tRNA18-ArgCCT   | 0.001 |
| tRNA27-MetCAT   | 0.022 |
| tRNA73-ArgCCG   | 0.003 |
| U2.3            | 0.025 |
| U6.168          | 0.031 |
| U6.375          | 0.000 |
| U6.601          | 0.000 |
| YRNA-255        | 0.001 |

| HIA+ (T3) vs HIA- (T3) | t-test  |
|------------------------|---------|
|                        | p-value |
| hsa-let-7a-5p          | 0.042   |
| hsa-let-7f-5p          | 0.000   |
| hsa-let-7i-5p          | 0.001   |
| hsa-miR-103a-3p        | 0.008   |
| hsa-miR-107            | 0.027   |
| hsa-miR-126-3p         | 0.039   |
| hsa-miR-144-3p         | 0.010   |
| hsa-miR-21-5p          | 0.004   |
| hsa-miR-34b-3p         | 0.050   |

|         |       |
|---------|-------|
| RNU6-4  | 0.004 |
| RNU6-45 | 0.004 |
| RNU6-6  | 0.005 |
| RNU6-7  | 0.009 |
| RNU6-73 | 0.008 |
| U2.3    | 0.033 |
| U6.375  | 0.034 |
| U6.601  | 0.014 |

| <b>HIA+ (T2) vs MSK (T2)</b> | <b>t-test</b>  |
|------------------------------|----------------|
|                              | <b>p-value</b> |
| hsa-miR-143-3p               | 0.023          |
| hsa-miR-16-1-3p              | 0.020          |
| RNU6-4                       | 0.012          |
| RNU6-45                      | 0.006          |
| RNU6-6                       | 0.015          |
| RNU6-7                       | 0.005          |
| RNU6-73                      | 0.011          |
| SNORA57                      | 0.048          |
| tRNA120-AlaAGC               | 0.003          |
| tRNA18-ArgCCT                | 0.004          |
| U6.168                       | 0.007          |
| U6.375                       | 0.016          |
| U6.601                       | 0.026          |
| Uco22cjl                     | 0.011          |
| YRNA-255                     | 0.013          |

| <b>HIA+ (T3) vs MSK (T3)</b> | <b>t-test</b>  |
|------------------------------|----------------|
|                              | <b>p-value</b> |
| hsa-let7f-5p                 | 0.005          |
| hsa-miR-135b-5p              | 0.001          |
| hsa-miR-144-3p               | 0.005          |
| hsa-miR-16-1-3p              | 0.001          |
| hsa-miR-21-5p                | 0.019          |
| hsa-miR-425-5p               | 0.001          |
| RNU4-6P                      | 0.021          |
| SNORA57                      | 0.004          |

|                |       |
|----------------|-------|
| tRNA120-AlaAGC | 0.015 |
| tRNA18-ArgCCT  | 0.019 |
| tRNA27-MetCAT  | 0.049 |
| U6.428         | 0.003 |
| put-miR-6      | 0.044 |
| YRNA-255       | 0.004 |

**eTable 10. Classifications of MSK Injuries by body part and injury type**

Injury details were available for samples from 22 players. The remainder either did not have information available (players from the Championship competition) or had an injury resulting in less than 24 hours lost from full participation.

| n=22                | Number (%) |
|---------------------|------------|
|                     |            |
| <b>Body Part</b>    |            |
| Shoulder            | 2 (9.10)   |
| Forearm/Hand        | 4 (18.18)  |
| Thoracic Spine      | 1 (4.55)   |
| Abdomen/Trunk       | 2 (9.10)   |
| Hip                 | 1 (4.55)   |
| Knee                | 1 (4.55)   |
| Lower Leg           | 3 (13.64)  |
| Foot/Ankle          | 8 (36.36)  |
|                     |            |
| <b>Injury Type</b>  |            |
| Ligament Sprain     | 11 (50)    |
| Haematoma/Contusion | 4 (18.18)  |
| Fracture            | 3 (13.64)  |
| Muscle Strain       | 1 (4.55)   |
| Dislocation         | 1 (4.55)   |
| Other               | 2 (9.10)   |

**eFigure 1:** Heat map of KEGG pathway analysis of differentially expressed microRNAs found in the comparison HA+ vs HIA- at T1.

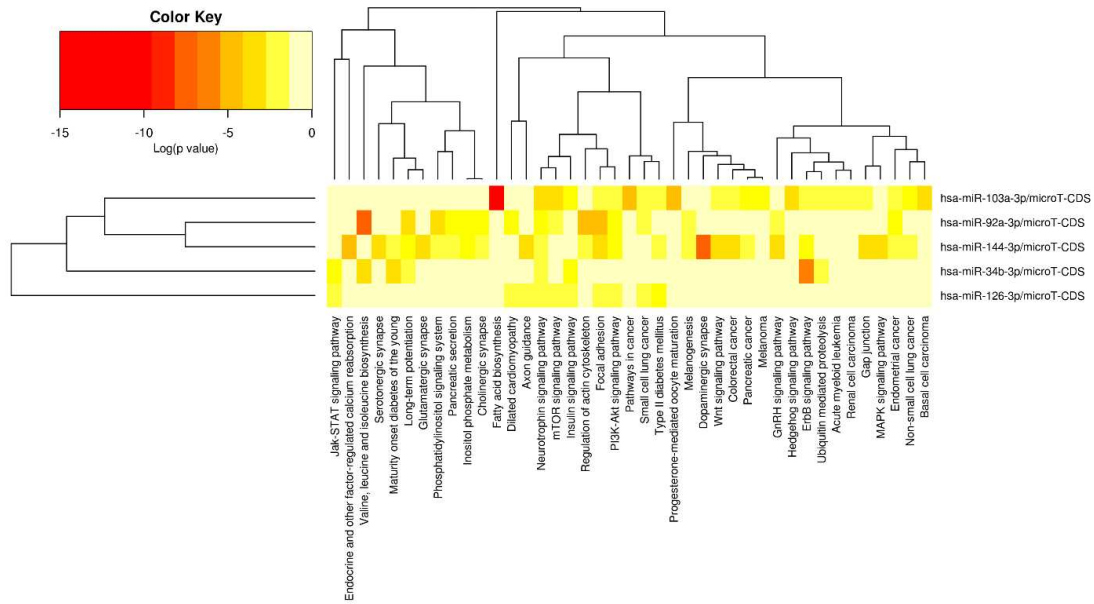

**Figure 2:** Heat map of KEGG pathway analysis of differentially expressed microRNAs found in the comparison HA+ vs HIA- at T2.

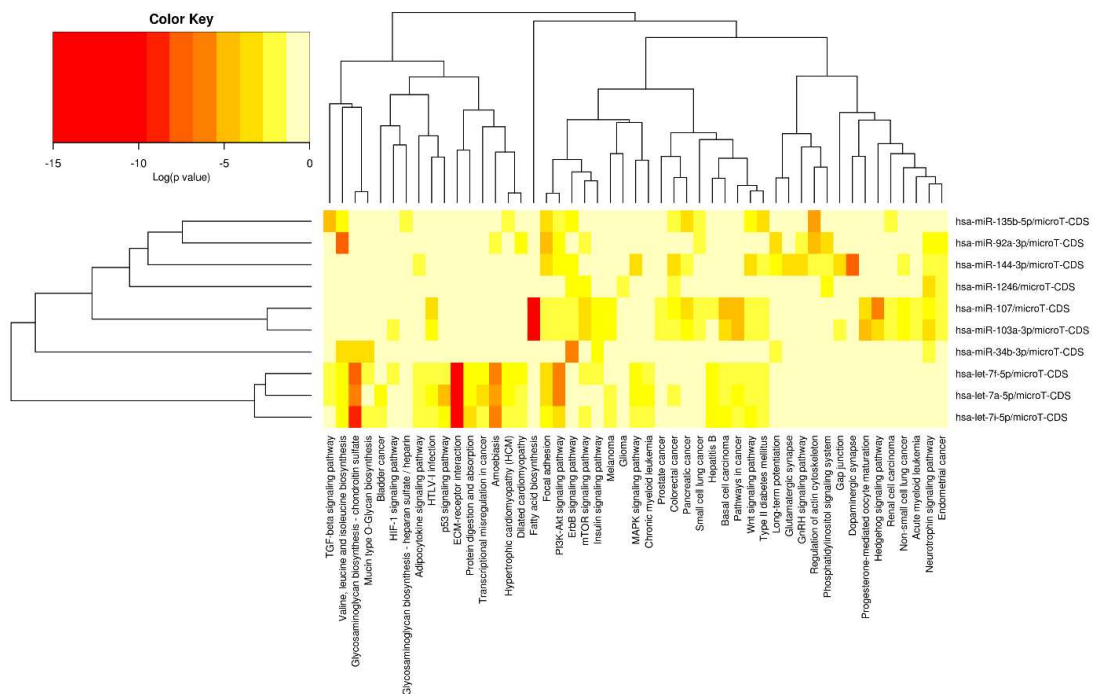

**eFigure 3:** Heat map of KEGG pathway analysis of differentially expressed microRNAs found in the comparison HA+ vs HIA- at T3.

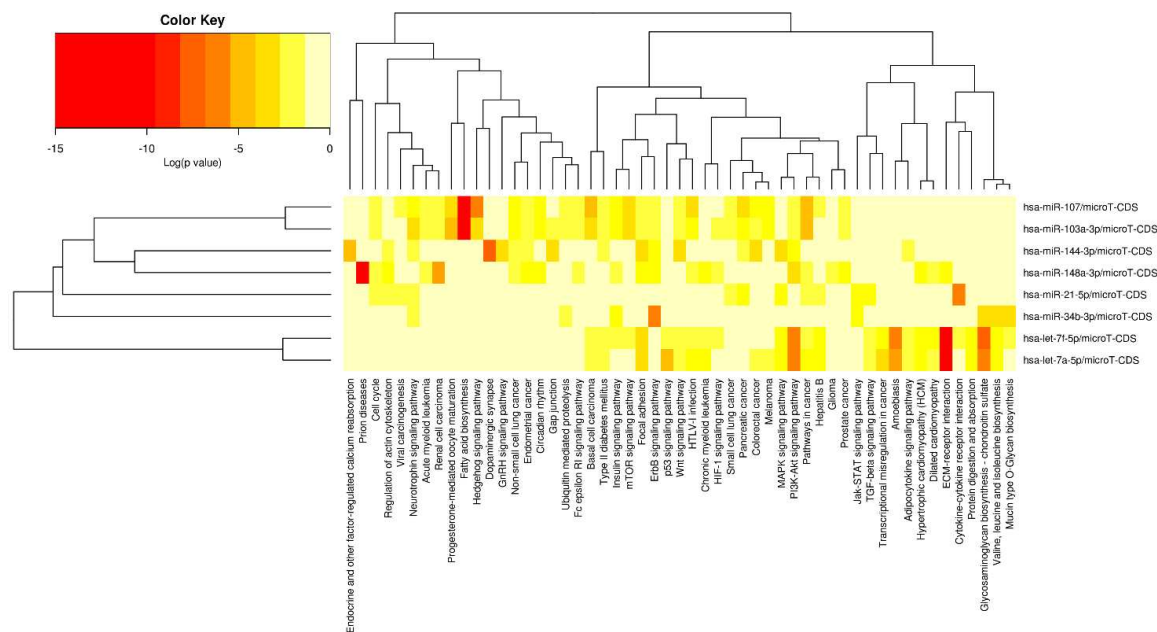

## References

- 1 HIA\_Protocol\_Detailed\_Description\_Landscape\_EN  
[https://playerwelfare.worldrugby.org/content/getfile.php?h=030cc0e5445023d2887628100863ace2&p=downloads/concussion/HIA\\_Protocol\\_Detailed\\_Description\\_Landscape\\_EN.pdf](https://playerwelfare.worldrugby.org/content/getfile.php?h=030cc0e5445023d2887628100863ace2&p=downloads/concussion/HIA_Protocol_Detailed_Description_Landscape_EN.pdf).
- 2 Langmead B, Salzberg SL. Fast gapped-read alignment with Bowtie 2. *Nat Methods* 2012; 9(4): 357–9.
- 3 Wu Y, Wei B, Liu H, et al. MiRPara: a SVM-based software tool for prediction of most probable microRNA coding regions in genome scale sequences. *BMC Bioinformatics* 2011; 12: 107.
- 4 Kozomara A, Griffiths-Jones S. miRBase: integrating microRNA annotation and deep-sequencing data. *Nucleic Acids Res* 2011; 39: D152–7.
- 5 Griffiths-Jones S, Saini HK, van Dongen S, Enright AJ. miRBase: tools for microRNA genomics. *Nucleic Acids Res* 2008; 36: D154–8.
- 6 McCarthy DJ, Chen Y, Smyth GK. Differential expression analysis of multifactor RNA-Seq experiments with respect to biological variation. *Nucleic Acids Res* 2012; 40(10): 4288–97.



7 Andersen CL, Ledet-Jensen J, Ørntoft T. Normalization of real-time quantitative RT-PCR data: a model based variance estimation approach to identify genes suited for normalization - applied to bladder- and colon-cancer data-sets. *Cancer Research* 2004 (64): 5245-5250.
